# Supplementary material for: Mental health disorders among healthcare workers during the COVID-19 pandemic: a cross-sectional survey from three major hospitals in Kenya
Source: PubMed Central journal article supplement — BMJ Open. 2021 Jun 9;11(6):e050316. doi: 10.1136/bmjopen-2021-050316 (PMC8190985; doi:10.1136/bmjopen-2021-050316), 2021-06-09
Supplement: bmjopen-2021-050316.draft_revisions.pdf [file bmjopen-2021-050316.draft_revisions.pdf]

# BMJ Open

BMJ Open is committed to open peer review. As part of this commitment we make the peer review history of every article we publish publicly available.

When an article is published we post the peer reviewers' comments and the authors' responses online. We also post the versions of the paper that were used during peer review. These are the versions that the peer review comments apply to.

The versions of the paper that follow are the versions that were submitted during the peer review process. They are not the versions of record or the final published versions. They should not be cited or distributed as the published version of this manuscript.

BMJ Open is an open access journal and the full, final, typeset and author-corrected version of record of the manuscript is available on our site with no access controls, subscription charges or pay-per-view fees (<http://bmjopen.bmj.com>).

If you have any questions on BMJ Open's open peer review process please email [info.bmjopen@bmj.com](mailto:info.bmjopen@bmj.com)

# BMJ Open

## MENTAL HEALTH DISORDERS AMONG HEALTH CARE WORKERS DURING THE COVID-19 PANDEMIC: A CROSS-SECTIONAL SURVEY FROM THREE MAJOR HOSPITALS IN KENYA.

|                               |                                                                                                                                                                                                                                                                                                                                                                                                                                                                                                                                                          |
|-------------------------------|----------------------------------------------------------------------------------------------------------------------------------------------------------------------------------------------------------------------------------------------------------------------------------------------------------------------------------------------------------------------------------------------------------------------------------------------------------------------------------------------------------------------------------------------------------|
| Journal:                      | <i>BMJ Open</i>                                                                                                                                                                                                                                                                                                                                                                                                                                                                                                                                          |
| Manuscript ID                 | bmjopen-2021-050316                                                                                                                                                                                                                                                                                                                                                                                                                                                                                                                                      |
| Article Type:                 | Original research                                                                                                                                                                                                                                                                                                                                                                                                                                                                                                                                        |
| Date Submitted by the Author: | 16-Feb-2021                                                                                                                                                                                                                                                                                                                                                                                                                                                                                                                                              |
| Complete List of Authors:     | Shah, Jasmit; The Aga Khan University Hospital Nairobi<br>Monroe-Wise, Aliza; University of Washington Seattle Campus<br>Talib, Zohray ; California University of Science and Medicine<br>Nabiswa, Alphonse; The Aga Khan University Hospital Nairobi<br>Said, Mohammed; Avenue Hospital<br>Abeid, Abdulaziz; Coast General Teaching and Referral Hospital<br>Ali Mohamed, Mohamed; Coast General Teaching and Referral Hospital<br>Mohamed, Sood; Coast General Teaching and Referral Hospital<br>Ali, Sayed; The Aga Khan University Hospital Nairobi, |
| Keywords:                     | COVID-19, Public health < INFECTIOUS DISEASES, MENTAL HEALTH, Depression & mood disorders < PSYCHIATRY                                                                                                                                                                                                                                                                                                                                                                                                                                                   |
|                               |                                                                                                                                                                                                                                                                                                                                                                                                                                                                                                                                                          |

SCHOLARONE™  
Manuscripts

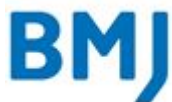

I, the Submitting Author has the right to grant and does grant on behalf of all authors of the Work (as defined in the below author licence), an exclusive licence and/or a non-exclusive licence for contributions from authors who are: i) UK Crown employees; ii) where BMJ has agreed a CC-BY licence shall apply, and/or iii) in accordance with the terms applicable for US Federal Government officers or employees acting as part of their official duties; on a worldwide, perpetual, irrevocable, royalty-free basis to BMJ Publishing Group Ltd ("BMJ") its licensees and where the relevant Journal is co-owned by BMJ to the co-owners of the Journal, to publish the Work in this journal and any other BMJ products and to exploit all rights, as set out in our [licence](#).

The Submitting Author accepts and understands that any supply made under these terms is made by BMJ to the Submitting Author unless you are acting as an employee on behalf of your employer or a postgraduate student of an affiliated institution which is paying any applicable article publishing charge ("APC") for Open Access articles. Where the Submitting Author wishes to make the Work available on an Open Access basis (and intends to pay the relevant APC), the terms of reuse of such Open Access shall be governed by a Creative Commons licence – details of these licences and which [Creative Commons](#) licence will apply to this Work are set out in our licence referred to above.

Other than as permitted in any relevant BMJ Author's Self Archiving Policies, I confirm this Work has not been accepted for publication elsewhere, is not being considered for publication elsewhere and does not duplicate material already published. I confirm all authors consent to publication of this Work and authorise the granting of this licence.

1  
2  
3 **MENTAL HEALTH DISORDERS AMONG HEALTH CARE WORKERS**  
4 **DURING THE COVID-19 PANDEMIC: A CROSS-SECTIONAL SURVEY**  
5 **FROM THREE MAJOR HOSPITALS IN KENYA.**  
6  
7  
8  
9

10 *Jasmit Shah, Aliza Monroe-Wise, Zohray Talib, Alphonse Nabiswa, Mohammed*  
11 *Said, Abdulaziz Abeid, Mohamed Ali Mohamed, Sood Mohamed, Sayed K Ali*  
12  
13  
14  
15  
16  
17  
18  
19  
20  
21  
22  
23  
24  
25  
26  
27  
28  
29  
30  
31  
32  
33  
34  
35  
36  
37  
38  
39  
40  
41  
42  
43  
44  
45  
46  
47  
48  
49  
50  
51  
52  
53  
54  
55  
56  
57  
58  
59  
60

1  
2  
3 Jasmit Shah, PhD  
4 Department of Medicine,  
5 Aga Khan University,  
6 3<sup>rd</sup> Parklands Avenue, Nairobi, Kenya  
7  
8

9 Aliza Monroe-Wise, MD  
10 Department of Global Health,  
11 University of Washington  
12 Seattle, WA 98195, USA  
13

14 Zohray Talib, MD  
15 Department of Medical Education,  
16 California University of Science and Medicine  
17 Colton, CA 92324, USA  
18  
19

20 Alphonse Nabiswa, MBChB  
21 Department of Medicine,  
22 Aga Khan University,  
23 3<sup>rd</sup> Parklands Avenue, Nairobi, Kenya  
24  
25

26 Mohammed Said, MMed  
27 Avenue Hospital,  
28 1<sup>st</sup> Parklands Avenue, Nairobi, Kenya  
29

30 Abdulaziz Abeid, MMed  
31 Department of Medicine  
32 Coast General Teaching and Referral Hospital,  
33 Kisauni Road, Mombasa, Kenya  
34  
35

36 Mohamed Ali Mohamed, MBChB  
37 Department of Medicine  
38 Coast General Teaching and Referral Hospital,  
39 Kisauni Road, Mombasa, Kenya  
40  
41

42 Sood Mohamed, MMed  
43 Coast General Teaching and Referral Hospital,  
44 Kisauni Road, Mombasa, Kenya  
45

46 Corresponding Author:

47 Sayed K Ali, MD  
48 Department of Medicine,  
49 Aga Khan University,  
50 3<sup>rd</sup> Parklands Avenue, Nairobi, Kenya  
51  
52  
53  
54  
55  
56  
57  
58  
59  
60

## ABSTRACT

### Background:

COVID-19 is an international global health emergency and has posed a great challenge to mental well-being and resilience. Little is known about the mental health impact of COVID-19 among HCWs in sub-Saharan Africa or other low-resource settings.

### Methods:

We conducted a cross-sectional study between August and November 2020 among HCWs recruited from three major hospitals in Kenya. The survey questionnaire consisted of six components- demographic and work title characteristics, information regarding care of COVID-19 patients, symptoms of depression, anxiety, insomnia, distress and burnout, measured using standardized questionnaires. Multivariable logistic regression analysis was performed to identify factors associated with mental health disorders.

### Results:

A total 433 (65.2% response rate) individuals agreed to participate in the survey. Median age was 32.75 years, 58.4% were females and 68.8% were frontline workers. Depression, anxiety, insomnia, distress, and burnout were reported in 53.6%, 44.3%, 41.1%, 31.0%, and 45.8% of all participants respectively. Frontline HCWs, females, and doctors were at higher risk of mental health symptoms. Nearly half of participants reported inadequate resources or training to care for COVID-19 patients, and those in the government hospital were more likely to report mental health symptoms.

## Conclusions:

To our knowledge, this is the first study looking at mental health outcomes among health care workers during the COVID-19 pandemic in Kenya. Similar to other studies from around the world, HCWs directly involved with COVID-19 patients reported higher rates of mental health symptoms. Mitigating strategies specific to Kenyan HCWs are urgently needed to help cope with mental health symptoms during the pandemic.

## Strengths and Limitations

- This is one of the first articles reporting the prevalence of mental health disorders among HCWs in sub-Saharan Africa during the COVID-19 pandemic.
- Mental health disorders were measured using specific standardized questionnaires.
- The study was conducted between the first and second waves of the virus outbreak and the results might not be suggestive of the long-term psychological disorders within our HCW population.
- There is need for urgent and cost-effective mitigating strategies to help curb the burden of mental health disorders among healthcare workers caring for COVID-19 patients in Kenya.

## BACKGROUND

The immense toll of the global SARS CoV-2 pandemic continues to rise, with over 87 million confirmed cases and almost 1.9 million deaths to date <sup>1</sup>. COVID-19 reached Kenya in March 2020, and as of December 2020, there were over 97,000 confirmed cases and 1,700 deaths <sup>1</sup>. COVID-19 has had a significant impact on the healthcare workforce. Increased work-load, long hours, inadequate personal protective equipment (PPE), the need to make ethically and morally difficult decisions, a lack of social support, isolation from and fear of infecting family members and oneself can have major impacts on the mental health of frontline workers <sup>2</sup>. Multiple recent studies conducted in Turkey, Singapore, India, Italy, Spain, China and the United States have shown increased rates of stress, depression, anxiety and burnout among healthcare workers (HCW) taking care of COVID-19 patients compared with those not caring for COVID-19 patients <sup>3-14</sup>. Risk factors for mental health symptoms among HCWs caring for COVID-19 patients include being female, young, single, having minimal work experience and working on the frontlines <sup>3</sup>. Unfortunately, the psychological impact of the COVID-19 pandemic has also resulted in HCWs suicides <sup>15</sup>.

Quality healthcare, especially during a pandemic, requires a robust health workforce with adequate numbers, optimal physical and mental well-being and a supportive environment. Many parts of Africa continue to struggle with the rising cases of COVID-19 amidst limited medical resources and infrastructure, inadequate health care workforce and minimal ICU beds. The Organization for Economic Co-operation and Development (OECD) in 2020 reported 2.6 and 3 physicians and 11.9 and 7.8 nurses per 1,000 people in the United States and United Kingdom respectively. Austria reported the most physicians (5.2) while Norway reported the most nurses (18) per 1,000 people <sup>16</sup>. Most recent corresponding figures from the WHO in Kenya were 0.2 physicians and 1.2 nurses



1  
2  
3 per 1,000 people <sup>17</sup>. Additionally, Kenya has approximately 14 hospital beds per 10,000 people  
4  
5 with 537 ICU beds and 256 ventilators serving a population of close to 50 million people <sup>17 18</sup>. In  
6  
7 contrast, the WHO in 2019 reported 25 hospital beds per 10,000 people in the United Kingdom  
8  
9 with a population of approximately 67 million people <sup>17</sup>. Many African countries have fragile  
10  
11 health care systems with fewer than 30 critical care beds for their entire population and only a  
12  
13 handful of fully trained critical care physicians, highlighting the lack of critical resources to  
14  
15 adequately address the COVID-19 pandemic in Africa <sup>2 19</sup>. Mental health resources and providers  
16  
17 are also lacking in Kenya. As of 2016, Kenya reported 0.18 psychiatrists and 0.002 psychologists  
18  
19 per 10,000 people with less than 1% of the public sector having access to any form of mental health  
20  
21 care services <sup>17 20</sup>. Furthermore, similar to other sub-Saharan African (SSA) countries, Kenya has  
22  
23 no formal mental health response plan within the larger COVID-19 strategic response <sup>20</sup>.  
24  
25  
26  
27  
28

29 Historical experiences with deadly pandemics can offer invaluable lessons to resource limited  
30  
31 settings. During the Ebola pandemic in Western Africa in the early parts of 2014, the pandemic  
32  
33 swiftly crippled an already weak health care system, resulting in approximately 69% of HCWs  
34  
35 deaths with anecdotal evidence of increasing mental health disorders among survivors <sup>21-23</sup>.  
36  
37 However, few studies have been conducted on the association of the Ebola pandemic on HCWs  
38  
39 mental health symptoms. Similarly, a year into the COVID-19 pandemic, little is known on the  
40  
41 effect of the pandemic on the mental health of HCWs in SSA or in any resource-limited setting.  
42  
43 We therefore aimed to measure the prevalence of mental health symptoms among HCWs in 3  
44  
45 major hospitals in Kenya, and to evaluate risk factors for mental health symptoms among HCWs  
46  
47 in these hospitals.  
48  
49  
50  
51  
52  
53  
54  
55  
56  
57  
58  
59  
60

## METHODS

### Study Design

We carried out a cross sectional study between August and November, 2020.

### Participants and Study Site

Physicians, including residents and fellows, and nurses were recruited from 1 government (Coast General Teaching and Referral Hospital, Mombasa (CGTRH)) and 2 private hospitals (Aga Khan University Hospital, Nairobi (AKUHN), and Avenue Hospital, Nairobi).

### Recruitment and Enrollment

Email addresses of all physicians and nurses in each hospital were obtained by the principal site investigator in each hospital with help of the Information Technology Department. Physicians and nurses were recruited from AKUHN, CGTRH and Avenue Hospital. Email invitations with a link to a voluntary, de-identified survey were sent to 725 HCWs.

### Ethical Approval

Approval for this study was obtained from the Institutional Ethics and Review Committee at the Aga Khan University, Nairobi and the hospital leadership at CGTRH and Avenue Hospital. Online consent was obtained from all the participants. Participants were allowed to withdraw from the study at any time without any consequences. The survey was anonymous, and confidentiality of information was assured. On conclusion of the survey, a score for each mental health disorder was computed and shared with the participants. If the scores indicated a mental health issue, the participants were directed to seek medical consultation with their primary care provider or the counselling services at the respective hospitals. If any of the participants indicated suicidal or homicidal ideations, they were directed to the mental health hotline at the Aga Khan University Hospital or an assigned physician at the CGTRH and Avenue Hospital.

## Procedures

Online survey data were collected through the Research Electronic Data Capture - REDCap platform (Vanderbilt and National Institute of Health) <sup>24</sup>. Email reminders were sent out twice a week from REDCap for participation in the survey. Every participant received a unique link allowing them to complete the survey only once. The survey questionnaire consisted of six components: demographic characteristics (including job title, experiences providing care to patients with COVID-19), and sections on symptoms of depression, anxiety, insomnia, distress and burnout. On average the surveys took about five to seven minutes to complete. Mental health symptoms were measured using the 9-item Patient Health Questionnaire (PHQ-9) for depression <sup>25</sup>, the 7-item Generalized Anxiety Disorder Questionnaire (GAD-7) for anxiety <sup>26</sup>, the 7-item Insomnia Severity Index Questionnaire (ISI) for insomnia <sup>27</sup>, the 22-item Impact of Event Scale– Revised (IES-R) for distress <sup>28</sup> and the 16-item Stanford Professional Fulfillment Index Questionnaire (SPFI) for burnout <sup>29</sup>. The cutoff score for detecting symptoms of major depression, anxiety, insomnia, and distress were 10, 7, 15, and 26, respectively <sup>10</sup>. The categories of the severity of each mental health disorder are presented in Table 1.

## Statistical Analysis

Categorical data were analyzed as frequencies and percentages whereas continuous data were analyzed as medians with interquartile ranges (IQR). The nonparametric Kruskal-Wallis test was utilized to compare the continuous variables and Fishers exact test was used to compare the categorical variables between two groups. To determine potential risk factors for symptoms of depression, anxiety, insomnia, distress, burnout and professional fulfillment in participants, a multivariate logistic regression analysis was performed, and the associations between risk factors and outcomes are presented as odds ratios (ORs) and 95% confidence intervals (CIs). The outcome

1  
2  
3 variables for the multivariate logistic regressions were mental health disorders dichotomized using  
4 the standard cutoffs as above. Data analysis was performed using SPSS statistical software version  
5  
6 20.0 (IBM Corp). The significance level was set at  $\alpha = .05$ , and all tests were 2-tailed.  
7  
8

### 9 10 **Patient and public involvement**

11  
12 Patients or the public were not involved in the research design, reporting, or survey dissemination  
13  
14 strategies of this study.  
15

### 16 17 **RESULTS**

18  
19 Of the 725 invited HCWs across the three hospitals, 473 (65.2%) responded to the survey and 433  
20  
21 (91.5%) consented to complete the survey (Table 2). The median age of the participants was 32.8  
22  
23 years (IQR: 29.71, 36.75). Of the 433 responding participants, 253 (58.4%) were females, and 244  
24  
25 (56.7%) were married. Most of the participants were medical doctors (243 [56.1%]) and of African  
26  
27 ethnicity (354 [82.5%]). A total of 298 participants (68.8%) were frontline HCWs directly engaged  
28  
29 in COVID-19 care and treatment. Of the frontline workers, 122 (41.1%) had cared for about 5-20  
30  
31 patients and 174 (58.8%) had lost a patient to COVID-19. Only 3.7% of all participants reported a  
32  
33 prior history or diagnosis of any mental health disorder.  
34  
35

36  
37 Using the standardized screening tools, depression, anxiety, insomnia, distress, and burnout were  
38  
39 reported in 53.6%, 44.3%, 41.1%, 31.0%, and 45.8% of all participants, respectively. Severe  
40  
41 symptoms of depression, anxiety, insomnia, distress, and burnout were more commonly reported  
42  
43 among frontline HCWs than colleagues who were not frontline HCWs. For example, severe  
44  
45 depression was reported among 11.6% of frontline HCWs (n=34) compared with 3.8% (n=5)  
46  
47 among workers not directly caring for COVID-19 patients ( $p < 0.001$ , Table 3).  
48  
49

50  
51 Multivariate logistic regression analysis showed that after adjustment, working on the frontlines  
52  
53 was an independent risk variable for all the mental health disorders (depression, OR 3.55; 95% CI,  
54  
55 1.77-7.11;  $p < 0.001$ ; anxiety, OR 2.51; 95% CI, 1.20-5.25;  $p = 0.014$ ; insomnia, OR 4.45; 95% CI,  
56  
57  
58  
59

1  
2  
3 1.51-13.10;  $p=0.007$ ; distress: OR, 1.89, 95% CI, 1.10-3.17;  $p=0.021$  and burnout: OR, 2.74, 95%  
4  
5 CI, 1.69-4.42;  $p<0.001$ ). Furthermore, being a doctor and being a female were associated with  
6  
7 severe symptoms of depression and anxiety, with an OR of 1.95 for severe depression among  
8  
9 women compared with men, (95% CI, 1.12-3.42;  $p=0.019$ ) and an OR of 2.29 for severe anxiety  
10  
11 among doctors compared with nurses (95% CI, 1.21-4.32;  $p=0.011$ ) (Table 4).

14  
15 Nearly half of frontline workers stated that they lacked adequate resources and PPE to care for  
16  
17 COVID-19 patients, and fewer felt that they needed additional training to take care of or treat  
18  
19 COVID-19 patients (resources: 45.8%, trained: 46.0%). On further analysis, we found that HCWs  
20  
21 employed in public institutions were more likely to report having inadequate resources than those  
22  
23 in the private hospital (OR 14.55, 95% CI, 5.99-35.34;  $p<0.001$ ), and were more likely to report  
24  
25 being inadequately trained (OR 3.61, 95% CI, 1.91-6.81;  $p<0.001$ ).

28  
29 Furthermore, respondents from the public institution reported experiencing more moderate to  
30  
31 severe symptom levels of depression, anxiety, insomnia, and distress (eg, moderate and severe  
32  
33 depression among private vs public: 67 [18.7%] vs 22 [32.4%];  $p=0.014$ , moderate and severe  
34  
35 anxiety among private vs public: 43 [12.3%] vs 19 [28.3%];  $p=0.008$ ; moderate and severe  
36  
37 insomnia among private vs public: 30 [8.5%] vs 15 [22.4%];  $p=0.004$  and distress among private  
38  
39 vs public: 62 [17.8%] vs 21 [33.3%];  $p=0.014$ ) (Table 5).

## 44 45 **DISCUSSION**

46  
47  
48 To our knowledge, this is the first study investigating mental health disorders among HCWs during  
49  
50 the COVID-19 pandemic in Kenya, and among the first to evaluate the associations between  
51  
52 COVID-19 and mental health symptoms in any resource-limited setting. Our study examined  
53  
54 HCWs in one government and two private hospitals in Kenya actively involved in the care of  
55  
56  
57  
58  
59  
60

1  
2  
3 COVID-19 patients. Two of the institutions were located in Nairobi and one in Mombasa; both  
4 major cities have been greatly affected by COVID-19.  
5  
6  
7

8 In our study depression, anxiety, insomnia, distress, and burnout were reported in 53.6%, 44.3%,  
9 41.1%, 31.0%, and 45.8% of all participants despite only 3.7% reporting ever having mental health  
10 disorders previously. Most participants were married, female and doctors. Similar to studies  
11 conducted in other countries, being a frontline worker was associated with higher scores for  
12 depression, anxiety, insomnia, distress and burnout. Our study also showed that being a female  
13 and a doctor was significantly associated with severe symptoms of depression and anxiety. This is  
14 in contrast to other studies in which nurses experienced more psychological symptoms associated  
15 with caring for COVID-19 patients<sup>8 10 30</sup>.  
16  
17  
18  
19  
20  
21  
22  
23  
24  
25  
26

27 The median age of our study population was 32.8 years. Unlike other studies in which younger  
28 HCWs experienced a higher prevalence of stress, anxiety and poor psychological well-being, our  
29 study did not find an association between HCWs' age and mental health disorders<sup>5 31 32</sup>.  
30 Furthermore, in contrast to other studies conducted in higher income countries, our study showed  
31 higher overall percentages of depression, anxiety, and insomnia among frontline HCWs. This  
32 important finding in our setting could be attributed to the limited resources and lack of mitigating  
33 strategies such as a formal mental health response plan, readily available mental health services,  
34 regulation of work hours and adequate medical resources in Kenya.  
35  
36  
37  
38  
39  
40  
41  
42  
43  
44  
45

46 A recent study on mental health disorders among trainees at three American academic medical  
47 centers found that trainees taking care of COVID-19 patients had higher rates of burnout compared  
48 to those not taking care of COVID-19 patients, but found no significant difference in professional  
49 fulfillment scores<sup>33</sup>. On the contrary, a study in Turkey showed a lower level of burnout in  
50 physicians taking care of COVID-19 patients compared with physicians who took care of non  
51  
52  
53  
54  
55  
56  
57  
58  
59  
60

1  
2  
3 COVID-19 patients<sup>34</sup>. In our study, we found statistically higher rates of burnout among all cadres  
4 of HCWs at all institutions taking care of COVID-19 patients compared to those not taking care  
5 of COVID-19 patients. We found no statistical difference in professional fulfillment scores.  
6  
7  
8

9  
10 Overall, we found that half of the respondents felt inadequately trained and reported lack of enough  
11 resources and PPE to safely care for COVID-19 patients. A study looking at HCW knowledge,  
12 attitude and practices in Uganda found that 69% reported sufficient knowledge and 74% had a  
13 positive attitude around COVID-19<sup>35</sup>. Similarly, Mbachu and colleagues reported excellent  
14 knowledge and good preventative practices towards COVID-19 in Nigeria<sup>36</sup>.  
15  
16  
17  
18  
19  
20  
21  
22

23 In our study, HCWs at the government hospital felt less trained with inadequate resources and PPE  
24 to take care of COVID-19 patients than those in the private hospitals. Mbachu and colleagues  
25 showed that a lack of PPE had a negative impact on the attitudes of HCWs in Nigeria<sup>36</sup>. Likewise,  
26 in our study, HCWs in the government institution also showed significantly higher rates of  
27 depression, anxiety, insomnia and distress than those in the private hospitals. We could find no  
28 other study comparing mental health outcomes between private and government hospital in our or  
29 any other settings. In addition to the absence of mitigating strategies unique to HCWs taking care  
30 of COVID-19 patients, our findings also stress the importance of adequate medical personnel,  
31 training, critical care beds and other key resources to help fortify fragile health care systems within  
32 many African countries and to better tackle the COVID-19 pandemic.  
33  
34  
35  
36  
37  
38  
39  
40  
41  
42  
43  
44  
45

46 Like many other countries in SSA, Kenya lacks a formal mental health response plan to the  
47 COVID-19 pandemic. A dynamic mental health response plan designed by mental health experts  
48 specific to the needs of the country and grassroots training of community health workers and  
49 volunteers, especially HIV counsellors and retired nurses, remains key not only to target the  
50 population at large but also to focus on providing key mental health services to HCWs in  
51  
52  
53  
54  
55  
56  
57  
58  
59  
60

1  
2  
3 institutions across the country <sup>2</sup>. Like many other African countries, regular press releases on  
4 television and radios are used to disseminate key information on COVID-19 in Kenya <sup>37</sup>. We  
5 propose that such platforms not only be used to educate the population on COVID-19 but also to  
6 demystify the stigma around seeking mental health services related to COVID-19. Of note, Kenya  
7 has a 91% penetration of mobile subscriptions allowing the use of mobile health applications to  
8 further enhance the delivery of care not only to the local population, but also health care workers  
9  
10 <sup>20</sup>. In addition, toll-free mental health helplines could be a key step to improving access to mental  
11 health services especially for specific populations such as HCWs providing care to COVID-19  
12 patients <sup>37</sup>. Senior leadership at every hospital, with the support of the government and donor  
13 organizations, should seek creative ways to enhance the mental health capabilities and resources  
14 especially for HCWs taking care of COVID-19 patients. This includes either investing in training  
15 and capacity building opportunities or sharing resources among various hospitals geographically  
16 and electronically to better support the response process. Providing daily allowances to frontline  
17 HCWs, additional tax relief, as well as publicly acknowledging their heroic efforts might be ways  
18 to boost morale and improve mental health outcomes in limited resource settings <sup>2</sup>.  
19  
20  
21  
22  
23  
24  
25  
26  
27  
28  
29  
30  
31  
32  
33  
34  
35  
36  
37

38 Our study has several limitations. It was conducted in one government hospital in Mombasa and  
39 two private hospitals in Nairobi, with different funding structures. Secondly, our study was  
40 conducted between the first and second waves of the virus outbreak and our results might not be  
41 suggestive of the long-term psychological disorders within our HCW population. Thirdly, we  
42 primarily used electronic mail with frequent reminders, which could have potentially limited our  
43 response rate. Lastly, there may have been a response bias in that non-responders may have been  
44 suffering from mental health symptoms, limiting the motivation to respond.  
45  
46  
47  
48  
49  
50  
51  
52  
53

## 54 CONCLUSION



1  
2  
3 Our study, the first conducted in Kenya and one of the first in a low-resource healthcare setting,  
4 shows markedly higher rates of mental health disorders including depression and anxiety in all  
5 health care workers taking care of COVID-19 patients than those not caring for COVID-19  
6 patients, and higher rates than those reported in higher-income countries. Being a doctor and a  
7 female were associated with severe symptoms of depression and anxiety. Furthermore, HCWs in  
8 the government institution experienced higher rates of mental health symptoms than their  
9 counterparts in private institutions. This study highlights the urgent need for cost-effective, easy  
10 to replicate and rapid to implement mitigating strategies to help curb the burden of mental health  
11 disorders associated with caring for COVID-19 patients in Kenya and other resource-limited  
12 countries. Special attention should be paid to HCWs in the government hospitals.  
13  
14  
15  
16  
17  
18  
19  
20  
21  
22  
23  
24  
25  
26  
27  
28  
29  
30  
31  
32  
33  
34  
35  
36  
37  
38  
39  
40  
41  
42  
43  
44  
45  
46  
47  
48  
49  
50  
51  
52  
53  
54  
55  
56  
57  
58  
59  
60

## REFERENCES

1. World Health Organization. WHO Coronavirus Disease (COVID-19) Dashboard [Available from: <https://covid19.who.int/> accessed 9 Jan 2021.
2. Chersich MF, Gray G, Fairlie L, et al. COVID-19 in Africa: care and protection for frontline healthcare workers. *Globalization and health* 2020;16(1):46. doi: 10.1186/s12992-020-00574-3 [published Online First: 2020/05/18]
3. Elbay RY, Kurtulmuş A, Arpacioğlu S, et al. Depression, anxiety, stress levels of physicians and associated factors in Covid-19 pandemics. *Psychiatry research* 2020;290:113130. doi: 10.1016/j.psychres.2020.113130 [published Online First: 2020/06/05]
4. Chew NWS, Lee GKH, Tan BYQ, et al. A multinational, multicentre study on the psychological outcomes and associated physical symptoms amongst healthcare workers during COVID-19 outbreak. *Brain, behavior, and immunity* 2020;88:559-65. doi: 10.1016/j.bbi.2020.04.049 [published Online First: 2020/04/25]
5. Rossi R, Socci V, Pacitti F, et al. Mental Health Outcomes Among Frontline and Second-Line Health Care Workers During the Coronavirus Disease 2019 (COVID-19) Pandemic in Italy. *JAMA network open* 2020;3(5):e2010185. doi: 10.1001/jamanetworkopen.2020.10185 [published Online First: 2020/05/29]
6. Evanoff BA, Strickland JR, Dale AM, et al. Work-Related and Personal Factors Associated With Mental Well-Being During the COVID-19 Response: Survey of Health Care and Other Workers. *Journal of medical Internet research* 2020;22(8):e21366. doi: 10.2196/21366 [published Online First: 2020/08/09]
7. Shechter A, Diaz F, Moise N, et al. Psychological distress, coping behaviors, and preferences for support among New York healthcare workers during the COVID-19 pandemic. *General hospital psychiatry* 2020;66:1-8. doi: 10.1016/j.genhosppsych.2020.06.007 [published Online First: 2020/06/27]
8. Pappa S, Ntella V, Giannakas T, et al. Prevalence of depression, anxiety, and insomnia among healthcare workers during the COVID-19 pandemic: A systematic review and meta-analysis. *Brain, behavior, and immunity* 2020;88:901-07. doi: 10.1016/j.bbi.2020.05.026 [published Online First: 2020/05/22]
9. Bohlken J, Schömig F, Lemke MR, et al. [COVID-19 Pandemic: Stress Experience of Healthcare Workers - A Short Current Review]. *Psychiatrische Praxis* 2020;47(4):190-97. doi: 10.1055/a-1159-5551 [published Online First: 2020/04/28]
10. Lai J, Ma S, Wang Y, et al. Factors Associated With Mental Health Outcomes Among Health Care Workers Exposed to Coronavirus Disease 2019. *JAMA network open* 2020;3(3):e203976. doi: 10.1001/jamanetworkopen.2020.3976 [published Online First: 2020/03/24]
11. Zhang WR, Wang K, Yin L, et al. Mental Health and Psychosocial Problems of Medical Health Workers during the COVID-19 Epidemic in China. *Psychotherapy and psychosomatics* 2020;89(4):242-50. doi: 10.1159/000507639 [published Online First: 2020/04/10]
12. Martínez-López J, Lázaro-Pérez C, Gómez-Galán J, et al. Psychological Impact of COVID-19 Emergency on Health Professionals: Burnout Incidence at the Most Critical Period in Spain. *Journal of clinical medicine* 2020;9(9) doi: 10.3390/jcm9093029 [published Online First: 2020/09/24]
13. Liu X, Chen J, Wang D, et al. COVID-19 Outbreak Can Change the Job Burnout in Health Care Professionals. *Frontiers in psychiatry* 2020;11:563781. doi: 10.3389/fpsy.2020.563781 [published Online First: 2020/12/29]
14. Khasne RW, Dhakulkar BS, Mahajan HC, et al. Burnout among Healthcare Workers during COVID-19 Pandemic in India: Results of a Questionnaire-based Survey. *Indian journal of critical care*

- 1  
2  
3 *medicine : peer-reviewed, official publication of Indian Society of Critical Care Medicine*  
4 2020;24(8):664-71. doi: 10.5005/jp-journals-10071-23518 [published Online First: 2020/10/08]  
5  
6 15. Watkins A, Rothfeld M, Rashbaum WK, et al. Top E.R. Doctor Who Treated Virus Patients Dies by  
7 Suicide. *New York Times* 2020 27 April 2020.  
8  
9 16. OECD. OECD Health Indicators, OECD [Available from: <https://data.oecd.org/health.htm> accessed 9  
10 Jan 2021.  
11  
12 17. World Health Organization. The Global Health Observatory [23 Dec]. Available from:  
13 <http://www.who.int/hrh/statistics/hwfstats/> accessed 2020.  
14  
15 18. Barasa EW, Ouma PO, Okiro EA. Assessing the hospital surge capacity of the Kenyan health system in  
16 the face of the COVID-19 pandemic. *PloS one* 2020;15(7):e0236308-e08. doi:  
17 10.1371/journal.pone.0236308  
18  
19 19. Murthy S, Leligdowicz A, Adhikari NK. Intensive care unit capacity in low-income countries: a  
20 systematic review. *PloS one* 2015;10(1):e0116949. doi: 10.1371/journal.pone.0116949  
21 [published Online First: 2015/01/27]  
22  
23 20. Jaguga F, Kwobah E. Mental health response to the COVID-19 pandemic in Kenya: a review.  
24 *International journal of mental health systems* 2020;14:68. doi: 10.1186/s13033-020-00400-8  
25 [published Online First: 2020/08/22]  
26  
27 21. Kamara S, Walder A, Duncan J, et al. Mental health care during the Ebola virus disease outbreak in  
28 Sierra Leone. *Bulletin of the World Health Organization* 2017;95(12):842-47. doi:  
29 10.2471/blt.16.190470 [published Online First: 2017/12/05]  
30  
31 22. International Medical Corps. Assessment of Mental Health and Psychosocial Support (MHPSS) Needs  
32 and Resources in the Context of Ebola 2014 [Available from:  
33 [http://ebolacommunicationnetwork.org/wp-content/uploads/2015/01/IMC-Sierra-Leone-Dec-](http://ebolacommunicationnetwork.org/wp-content/uploads/2015/01/IMC-Sierra-Leone-Dec-2014-Ebola-MHPSS-Assessment.pdf)  
34 [2014-Ebola-MHPSS-Assessment.pdf](http://ebolacommunicationnetwork.org/wp-content/uploads/2015/01/IMC-Sierra-Leone-Dec-2014-Ebola-MHPSS-Assessment.pdf) accessed 9 Jan 2021.  
35  
36 23. World Health Organization. Health worker Ebola infections in Guinea, Liberia and Sierra Leone 2015  
37 [Available from: [https://www.who.int/hrh/documents/21may2015\\_web\\_final.pdf](https://www.who.int/hrh/documents/21may2015_web_final.pdf) accessed 9  
38 Jan 2021.  
39  
40 24. Harris PA, Taylor R, Minor BL, et al. The REDCap consortium: Building an international community of  
41 software platform partners. *Journal of biomedical informatics* 2019;95:103208. doi:  
42 10.1016/j.jbi.2019.103208 [published Online First: 2019/05/13]  
43  
44 25. Kroenke K, Spitzer RL, Williams JB. The PHQ-9: validity of a brief depression severity measure.  
45 *Journal of general internal medicine* 2001;16(9):606-13. doi: 10.1046/j.1525-  
46 1497.2001.016009606.x [published Online First: 2001/09/15]  
47  
48 26. Spitzer RL, Kroenke K, Williams JB, et al. A brief measure for assessing generalized anxiety disorder:  
49 the GAD-7. *Archives of internal medicine* 2006;166(10):1092-7. doi:  
50 10.1001/archinte.166.10.1092 [published Online First: 2006/05/24]  
51  
52 27. Morin CM, Belleville G, Bélanger L, et al. The Insomnia Severity Index: psychometric indicators to  
53 detect insomnia cases and evaluate treatment response. *Sleep* 2011;34(5):601-8. doi:  
54 10.1093/sleep/34.5.601 [published Online First: 2011/05/03]  
55  
56 28. Motlagh H. Impact of Event Scale-revised. *Journal of physiotherapy* 2010;56(3):203. doi:  
57 10.1016/s1836-9553(10)70029-1 [published Online First: 2010/08/28]  
58  
59 29. Trockel M, Bohman B, Lesure E, et al. A Brief Instrument to Assess Both Burnout and Professional  
60 Fulfillment in Physicians: Reliability and Validity, Including Correlation with Self-Reported  
61 Medical Errors, in a Sample of Resident and Practicing Physicians. *Academic psychiatry : the  
62 journal of the American Association of Directors of Psychiatric Residency Training and the  
63 Association for Academic Psychiatry* 2018;42(1):11-24. doi: 10.1007/s40596-017-0849-3  
64 [published Online First: 2017/12/03]

- 1  
2  
3 30. Tan BYQ, Chew NWS, Lee GKH, et al. Psychological Impact of the COVID-19 Pandemic on Health Care  
4 Workers in Singapore. *Annals of internal medicine* 2020;173(4):317-20. doi: 10.7326/m20-1083  
5 [published Online First: 2020/04/07]  
6  
7 31. Badahdah A, Khamis F, Al Mahyijari N, et al. The mental health of health care workers in Oman  
8 during the COVID-19 pandemic. *The International journal of social psychiatry*  
9 2020:20764020939596. doi: 10.1177/0020764020939596 [published Online First: 2020/07/09]  
10  
11 32. Youssef N, Mostafa A, Ezzat R, et al. Mental health status of health-care professionals working in  
12 quarantine and non-quarantine Egyptian hospitals during the COVID-19 pandemic. *Eastern*  
13 *Mediterranean health journal = La revue de sante de la Mediterranee orientale = al-Majallah al-*  
14 *sihhiyah li-sharq al-mutawassit* 2020;26(10):1155-64. doi: 10.26719/emhj.20.116 [published  
15 Online First: 2020/10/27]  
16  
17 33. Kannampallil TG, Goss CW, Evanoff BA, et al. Exposure to COVID-19 patients increases physician  
18 trainee stress and burnout. *PloS one* 2020;15(8):e0237301. doi: 10.1371/journal.pone.0237301  
19 [published Online First: 2020/08/08]  
20  
21 34. Dinibutun SR. Factors Associated with Burnout Among Physicians: An Evaluation During a Period of  
22 COVID-19 Pandemic. *Journal of healthcare leadership* 2020;12:85-94. doi: 10.2147/jhl.S270440  
23 [published Online First: 2020/09/29]  
24  
25 35. Olum R, Chekwech G, Wekha G, et al. Coronavirus Disease-2019: Knowledge, Attitude, and Practices  
26 of Health Care Workers at Makerere University Teaching Hospitals, Uganda. *Frontiers in public*  
27 *health* 2020;8:181. doi: 10.3389/fpubh.2020.00181 [published Online First: 2020/05/20]  
28  
29 36. Mbachu CNP, Azubuike CM, Mbachu, II, et al. COVID-19 infection: Knowledge, attitude, practices,  
30 and impact among healthcare workers in a South-Eastern Nigerian state. *Journal of infection in*  
31 *developing countries* 2020;14(9):943-52. doi: 10.3855/jidc.13248 [published Online First:  
32 2020/10/09]  
33  
34 37. Semo BW, Frissa SM. The Mental Health Impact of the COVID-19 Pandemic: Implications for Sub-  
35 Saharan Africa. *Psychology research and behavior management* 2020;13:713-20. doi:  
36 10.2147/prbm.S264286 [published Online First: 2020/09/29]  
37  
38  
39  
40  
41  
42  
43  
44  
45  
46  
47  
48  
49  
50  
51  
52  
53  
54  
55  
56  
57  
58  
59  
60

## ABBREVIATIONS

|        |                                                        |
|--------|--------------------------------------------------------|
| PPE    | Personal protective equipment                          |
| HCW    | Healthcare worker                                      |
| ICU    | Intensive care unit                                    |
| OECD   | Organization for Economic Co-operation and Development |
| WHO    | World Health Organization                              |
| SSA    | sub-Saharan Africa                                     |
| CGTRH  | Coast General Teaching and Referral Hospital, Mombasa  |
| AKUHN  | Aga Khan University Hospital, Nairobi                  |
| REDCap | Research Electronic Data Capture                       |
| PHQ    | Patient Health Questionnaire                           |
| GAD    | Generalized Anxiety Disorder                           |
| ISI    | Insomnia Severity Index                                |
| IES-R  | Impact of Event Scale–Revised                          |
| SPFI   | Stanford Professional Fulfillment Index                |
| IQR    | Interquartile ranges                                   |
| OR     | Odds Ratio                                             |
| CI     | Confidence Interval                                    |

## FOOTNOTES

**Contributors:** SKA developed the concept study and proposal, supervised the overall project and coordinated the study at AKUHN. AMW, ZT, and AN assisted in the study concept, design and editing of the survey. MS supervised data collection at the Avenue Hospital. AA, MAM and SM supervised the data collection at CGTRH. SKA and JS verified the underlying data. JS did the data analysis. JS and SA wrote the first draft of the paper. All authors reviewed, edited and provided comments on the first and subsequent drafts. All authors reviewed and approved the final manuscript.

1  
2  
3 **Funding:** This research did not receive any specific grant from any funding agencies.  
4  
5

6 **Competing interests:** The authors declare that they have no competing interests.  
7  
8

9  
10 **Patient and public involvement:** Patients and/or the public were not involved in the design, or  
11 conduct, or reporting, or dissemination plans of this research.  
12  
13

14  
15 **Patient consent for publication:** Not required  
16

17  
18 **Ethical approval:** Approval for this study was obtained from the Institutional Ethics and Review  
19 Committee at the Aga Khan University, Nairobi and the hospital leadership at CGTRH and Avenue  
20 Hospital.  
21  
22

23  
24  
25 **Data availability statement:** All participant data used in this research are anonymous. Participant  
26 data used for analysis are available on reasonable request from corresponding author, Sayed K.  
27 Ali at [sayed.karar@aku.edu](mailto:sayed.karar@aku.edu).  
28  
29  
30  
31  
32  
33  
34  
35  
36  
37  
38  
39  
40  
41  
42  
43  
44  
45  
46  
47  
48  
49  
50  
51  
52  
53  
54  
55  
56  
57  
58  
59  
60

---

**Scoring Categories for Mental Health Disorders**


---

**PHQ-9 (Depression)**

Normal (0 – 4)

Mild (5 – 9)

Moderate (10 – 14)

Severe (15 – 27)

*Binary Cut off - 10***IES-R (Distress)**

Normal (0 – 8)

Mild (9 – 25)

Moderate (26 – 43)

Severe (44 – 88)

*Binary Cut off - 26***GAD-7 (Anxiety)**

Normal (0 – 4)

Mild (5 – 9)

Moderate (10 – 14)

Severe (15 – 21)

*Binary Cut off - 7***SPFI (Burnout)**

Yes ( &gt; 1.33 )

No ( ≤ 1.33 )

**SPFI (Professional Fulfillment)**

Yes ( &gt; 3.0 )

No ( ≤ 3.0 )

**ISI (Insomnia)**

Normal (0 – 7)

Subthreshold (8 – 14)

Moderate (15 – 21)

Severe (22 – 28)

*Binary Cut off - 15*


---

 Table 1: Scoring categories for the mental health disorders
 

---

| <b>Characteristics</b>                       | <b>N (%)</b>         |
|----------------------------------------------|----------------------|
| Age (years) (n = 401) (median [IQR])         | 32.75 [29.71, 36.75] |
| Gender                                       |                      |
| Male                                         | 176 (40.6%)          |
| Female                                       | 253 (58.4%)          |
| Prefer not to disclose                       | 4 (1.0%)             |
| Marital Status (n = 430)                     |                      |
| Single                                       | 172 (40.0%)          |
| Married                                      | 244 (56.7%)          |
| Other                                        | 14 (3.3%)            |
| Ethnicity (n = 429)                          |                      |
| African                                      | 354 (82.5%)          |
| Asian                                        | 51 (11.9%)           |
| Other                                        | 24 (5.6%)            |
| Health Care Profession                       |                      |
| Nurses                                       | 190 (43.9%)          |
| Doctors                                      | 243 (56.1%)          |
| Direct care COVID                            |                      |
| Yes                                          | 298 (68.8%)          |
| No                                           | 135 (31.2%)          |
| Patients cared (n = 297)                     |                      |
| < 5 Patients                                 | 101 (34.0%)          |
| 5 - 20 Patients                              | 122 (41.1%)          |
| > 20 Patients                                | 74 (24.9%)           |
| Lost any patients (n = 296)                  |                      |
| Yes                                          | 174 (58.8%)          |
| No                                           | 122 (41.2%)          |
| Enough Resources to care for COVID (n = 297) |                      |
| Yes                                          | 161 (54.2%)          |
| No                                           | 136 (45.8%)          |
| Adequately Trained for COVID (n = 298)       |                      |
| Yes                                          | 161 (54.0%)          |
| No                                           | 137 (46.0%)          |
| History of Mental Health Disorder            |                      |
| Yes                                          | 16 (3.70%)           |
| No                                           | 398 (91.9%)          |
| Not Sure                                     | 15 (3.4%)            |
| Prefer not to disclose                       | 4 (1.0%)             |
| Diagnosis (n = 15)                           |                      |
| Anxiety                                      | 5 (33.3%)            |
| Depression                                   | 7 (46.7%)            |
| Epilepsy                                     | 1 (6.7%)             |



1  
2  
3  
4  
5  
6  
7  
8  
9  
10  
11  
12  
13  
14  
15  
16  
17  
18  
19  
20  
21  
22  
23  
24  
25  
26  
27  
28  
29  
30  
31  
32  
33  
34  
35  
36  
37  
38  
39  
40  
41  
42  
43  
44  
45  
46  
47  
48  
49  
50  
51  
52  
53  
54  
55  
56  
57  
58  
59  
60

|                        |           |
|------------------------|-----------|
| Depression and Anxiety | 2 (13.3%) |
| Still have symptoms    |           |
| Yes                    | 8 (50.0%) |
| No                     | 8 (50.0%) |

---

Table 2: Baseline characteristics of study participants (N = 433)

For peer review only

|                                        |                             | <i>Have you ever directly cared for a patient with COVID-19?</i> |                         |                         |                |
|----------------------------------------|-----------------------------|------------------------------------------------------------------|-------------------------|-------------------------|----------------|
|                                        |                             | <i>Total</i>                                                     | <i>Yes</i>              | <i>No</i>               | <i>P Value</i> |
| <b><u>Depression</u></b>               |                             | <b><u>(n = 425)</u></b>                                          | <b><u>(n = 292)</u></b> | <b><u>(n = 133)</u></b> |                |
| <b><i>PHQ-9</i></b>                    | None                        | 197 (46.4%)                                                      | 116 (39.7%)             | 81 (60.9%)              |                |
|                                        | Mild                        | 139 (32.7%)                                                      | 99 (33.9%)              | 40 (30.1%)              | <0.001         |
|                                        | Moderate                    | 50 (11.8%)                                                       | 43 (14.7%)              | 7 (5.3%)                |                |
|                                        | Severe                      | 39 (9.2%)                                                        | 34 (11.6%)              | 5 (3.8%)                |                |
|                                        | PHQ-9 Score                 | 5.00 [2.00, 9.00]                                                | 6.00 [3.00, 10.00]      | 3.00 [1.00, 6.00]       | <0.001         |
| <b><u>Anxiety</u></b>                  |                             | <b><u>(n = 418)</u></b>                                          | <b><u>(n = 287)</u></b> | <b><u>(n = 131)</u></b> |                |
| <b><i>GAD-7</i></b>                    | Minimal                     | 208 (49.8%)                                                      | 131 (45.6%)             | 77 (58.8%)              |                |
|                                        | Mild                        | 148 (35.4%)                                                      | 104 (36.2%)             | 44 (33.6%)              | 0.017          |
|                                        | Moderate                    | 33 (7.9%)                                                        | 27 (9.4%)               | 6 (4.6%)                |                |
|                                        | Severe                      | 29 (6.9%)                                                        | 25 (8.7%)               | 4 (3.1%)                |                |
|                                        | GAD-7 Score                 | 5.00 [2.00, 8.00]                                                | 5.00 [2.00, 8.00]       | 4.00 [1.00, 6.00]       | 0.002          |
| <b><u>Insomnia</u></b>                 |                             | <b><u>(n = 418)</u></b>                                          | <b><u>(n = 287)</u></b> | <b><u>(n = 131)</u></b> |                |
| <b><i>ISI</i></b>                      | None                        | 246 (58.9%)                                                      | 156 (54.4%)             | 90 (68.7%)              |                |
|                                        | Subthreshold                | 127 (30.4%)                                                      | 90 (31.4%)              | 37 (28.2%)              | 0.001          |
|                                        | Moderate                    | 39 (9.3%)                                                        | 36 (12.5%)              | 3 (2.3%)                |                |
|                                        | Severe                      | 6 (1.4%)                                                         | 5 (1.7%)                | 1 (0.8%)                |                |
|                                        | ISI Score                   | 6.00 [2.00, 10.00]                                               | 7.00 [2.00, 11.00]      | 5.00 [2.00, 8.00]       | 0.011          |
| <b><u>Distress</u></b>                 |                             | <b><u>(n = 410)</u></b>                                          | <b><u>(n = 281)</u></b> | <b><u>(n = 129)</u></b> |                |
| <b><i>IESR</i></b>                     | Normal                      | 283 (69.0%)                                                      | 185 (65.8%)             | 98 (76.0%)              |                |
|                                        | Mild                        | 44 (10.7%)                                                       | 28 (10.0%)              | 16 (12.4%)              | 0.008          |
|                                        | Moderate                    | 24 (5.9%)                                                        | 17 (6.0%)               | 7 (5.4%)                |                |
|                                        | Severe                      | 59 (14.4%)                                                       | 51 (18.1%)              | 8 (6.2%)                |                |
|                                        | IES-R Score                 | 14.00 [3.00, 28.00]                                              | 15.00 [3.00, 32.00]     | 12.00 [1.00, 23.00]     | 0.029          |
|                                        | Avoidance Subscale          | 0.80 [0.10, 1.40]                                                | 0.90 [0.10, 1.80]       | 0.60 [0.00, 1.10]       | 0.032          |
|                                        | Intrusion Subscale          | 0.65 [0.10, 1.30]                                                | 0.80 [0.10, 1.50]       | 0.60 [0.00, 1.10]       | 0.065          |
|                                        | Hyperarousal Subscale       | 0.40 [0.00, 1.20]                                                | 0.50 [0.20, 1.30]       | 0.30 [0.00, 0.80]       | 0.041          |
| <b><u>SPFI</u></b>                     |                             | <b><u>(n = 404)</u></b>                                          | <b><u>(n = 278)</u></b> | <b><u>(n = 126)</u></b> |                |
|                                        | Professional Fulfillment    | 54.17 [37.50, 75.00]                                             | 50.00 [33.33, 75.00]    | 58.33 [45.83, 75.00]    | <0.001         |
|                                        | Work Exhaustion             | 43.75 [25.00, 68.75]                                             | 50.00 [25.00, 75.00]    | 31.25 [18.75, 50.00]    | <0.001         |
|                                        | Interpersonal Disengagement | 20.42 [0.00, 37.50]                                              | 25.00 [0.00, 41.67]     | 8.33 [0.00, 25.00]      | <0.001         |
| <b><u>Burnout</u></b>                  |                             |                                                                  |                         |                         |                |
|                                        | ≤ 1.33                      | 219 (54.2%)                                                      | 130 (46.8%)             | 89 (70.6%)              | <0.001         |
|                                        | > 1.33                      | 185 (45.8%)                                                      | 148 (53.2%)             | 37 (29.4%)              |                |
| <b><u>Professional Fulfillment</u></b> |                             |                                                                  |                         |                         |                |
|                                        | ≤ 3.00                      | 327 (81.1%)                                                      | 231 (83.1%)             | 96 (76.8%)              | 0.168          |
|                                        | > 3.00                      | 76 (18.9%)                                                       | 47 (16.9%)              | 29 (23.2%)              |                |

Table 3: Severity categories and scores of Depression, Anxiety, Insomnia, Distress, Burnout, and Professional Fulfillment Measurements in Total Cohort and Categorized Between Direct COVID Care.

| Variable                 | Adj OR <sup>a</sup> | (95% CI)     | P Value | Variable                              | Adj OR <sup>a</sup> | (95% CI)     | P Value |
|--------------------------|---------------------|--------------|---------|---------------------------------------|---------------------|--------------|---------|
| <b>PHQ-9: Depression</b> |                     |              |         | <b>IES-R: Distress</b>                |                     |              |         |
| <i>Gender</i>            |                     |              |         | <i>Gender</i>                         |                     |              |         |
| Male                     | 1 [Reference]       |              | N/A     | Male                                  | 1 [Reference]       |              | N/A     |
| Female                   | 1.95                | (1.12, 3.42) | 0.019   | Female                                | 2.18                | (1.32, 3.60) | 0.002   |
| <i>Health Care</i>       |                     |              |         | <i>Health Care</i>                    |                     |              |         |
| Nurse                    | 1 [Reference]       |              | N/A     | Nurse                                 | 1 [Reference]       |              | N/A     |
| Doctor                   | 2.24                | (1.27, 3.94) | 0.005   | Doctor                                | 1.09                | (0.67, 1.76) | 0.738   |
| <i>COVID Care</i>        |                     |              |         | <i>COVID Care</i>                     |                     |              |         |
| Second-line              | 1 [Reference]       |              | N/A     | Second-line                           | 1 [Reference]       |              | N/A     |
| Frontline                | 3.55                | (1.77, 7.11) | <0.001  | Frontline                             | 1.89                | (1.10, 3.17) | 0.021   |
| <b>GAD-7: Anxiety</b>    |                     |              |         | <b>SPFI: Burnout</b>                  |                     |              |         |
| <i>Gender</i>            |                     |              |         | <i>Gender</i>                         |                     |              |         |
| Male                     | 1 [Reference]       |              | N/A     | Male                                  | 1 [Reference]       |              | N/A     |
| Female                   | 1.95                | (1.04, 3.65) | 0.036   | Female                                | 1.73                | (1.11, 2.71) | 0.017   |
| <i>Health Care</i>       |                     |              |         | <i>Health Care</i>                    |                     |              |         |
| Nurse                    | 1 [Reference]       |              | N/A     | Nurse                                 | 1 [Reference]       |              | N/A     |
| Doctor                   | 2.29                | (1.21, 4.32) | 0.011   | Doctor                                | 0.86                | (0.55, 1.34) | 0.858   |
| <i>COVID Care</i>        |                     |              |         | <i>COVID Care</i>                     |                     |              |         |
| Second-line              | 1 [Reference]       |              | N/A     | Second-line                           | 1 [Reference]       |              | N/A     |
| Frontline                | 2.51                | (1.20, 5.25) | 0.014   | Frontline                             | 2.74                | (1.69, 4.42) | <0.001  |
| <b>ISI: Insomnia</b>     |                     |              |         | <b>SPFI: Professional Fulfillment</b> |                     |              |         |
| <i>Gender</i>            |                     |              |         | <i>Gender</i>                         |                     |              |         |
| Male                     | 1 [Reference]       |              | N/A     | Male                                  | 1 [Reference]       |              | N/A     |
| Female                   | 1.77                | (0.85, 3.70) | 0.127   | Female                                | 0.72                | (0.42, 1.24) | 0.234   |
| <i>Health Care</i>       |                     |              |         | <i>Health Care</i>                    |                     |              |         |
| Nurse                    | 1 [Reference]       |              | N/A     | Nurse                                 | 1 [Reference]       |              | N/A     |
| Doctor                   | 3.08                | (1.38, 6.89) | 0.006   | Doctor                                | 0.90                | (0.52, 1.57) | 0.900   |
| <i>COVID Care</i>        |                     |              |         | <i>COVID Care</i>                     |                     |              |         |
| Second-line              | 1 [Reference]       |              | N/A     | Second-line                           | 1 [Reference]       |              | N/A     |
| Frontline                | 4.45                | (1.51, 13.1) | 0.007   | Frontline                             | 0.78                | (0.45, 1.37) | 0.788   |

Table 4: Multivariate logistic regression analysis. Adj OR: adjusted odds ratio, CI: confidence interval.

<sup>a</sup>Adjusted for age, gender, marital status, working title and COVID care where appropriate.

|                                        |              | <i>Hospital</i>          |                        |                |
|----------------------------------------|--------------|--------------------------|------------------------|----------------|
|                                        |              | <i>Private (n = 365)</i> | <i>Public (n = 68)</i> | <i>P Value</i> |
| <b><u>Depression</u></b>               | -            | <b><u>(n = 357)</u></b>  | <b><u>(n = 68)</u></b> |                |
| <b><u>PHQ-9</u></b>                    | None         | 176 (49.3%)              | 21 (30.9%)             | <i>0.014</i>   |
|                                        | Mild         | 114 (31.9%)              | 25 (36.8%)             |                |
|                                        | Moderate     | 39 (10.9%)               | 11 (16.2%)             |                |
|                                        | Severe       | 28 (7.8%)                | 11 (16.2%)             |                |
| <b><u>Anxiety</u></b>                  | -            | <b><u>(n = 351)</u></b>  | <b><u>(n = 67)</u></b> |                |
| <b><u>GAD-7</u></b>                    | Minimal      | 183 (52.1%)              | 25 (37.3%)             | <i>0.008</i>   |
|                                        | Mild         | 125 (35.6%)              | 23 (34.3%)             |                |
|                                        | Moderate     | 23 (6.6%)                | 10 (14.9%)             |                |
|                                        | Severe       | 20 (5.7%)                | 9 (13.4%)              |                |
| <b><u>Insomnia</u></b>                 | -            | <b><u>(n = 351)</u></b>  | <b><u>(n = 67)</u></b> |                |
| <b><u>ISI</u></b>                      | None         | 216 (61.5%)              | 30 (44.8%)             | <i>0.004</i>   |
|                                        | Subthreshold | 105 (29.9%)              | 22 (32.8%)             |                |
|                                        | Moderate     | 25 (7.1%)                | 14 (20.9%)             |                |
|                                        | Severe       | 5 (1.4%)                 | 1 (1.5%)               |                |
| <b><u>Distress</u></b>                 | -            | <b><u>(n = 347)</u></b>  | <b><u>(n = 63)</u></b> |                |
| <b><u>IESR</u></b>                     | Normal       | 246 (70.9%)              | 37 (58.7%)             | <i>0.014</i>   |
|                                        | Mild         | 39 (11.2%)               | 5 (7.9%)               |                |
|                                        | Moderate     | 15 (4.3%)                | 9 (14.3%)              |                |
|                                        | Severe       | 47 (13.5%)               | 12 (19.0%)             |                |
| <b><u>SPFI</u></b>                     | -            | <b><u>(n = 343)</u></b>  | <b><u>(n = 61)</u></b> |                |
| <b><u>Burnout</u></b>                  | -            |                          |                        |                |
|                                        | ≤ 1.33       | 190 (55.4%)              | 29 (47.5%)             | <i>0.268</i>   |
|                                        | > 1.33       | 153 (44.6%)              | 32 (52.5%)             |                |
| <b><u>Professional Fulfillment</u></b> |              |                          |                        |                |
|                                        | ≤ 3.00       | 275 (80.4%)              | 52 (85.2%)             | <i>0.478</i>   |
|                                        | > 3.00       | 67 (19.6%)               | 9 (14.8%)              |                |

Table 5: Severity categories of Depression, Anxiety, Insomnia, Distress, Burnout, and Professional Fulfillment Measurements in Total Cohort and Categorized Between Private and Public Hospital.

# BMJ Open

## MENTAL HEALTH DISORDERS AMONG HEALTH CARE WORKERS DURING THE COVID-19 PANDEMIC: A CROSS-SECTIONAL SURVEY FROM THREE MAJOR HOSPITALS IN KENYA.

|                                 |                                                                                                                                                                                                                                                                                                                                                                                                                                                                                                                                                          |
|---------------------------------|----------------------------------------------------------------------------------------------------------------------------------------------------------------------------------------------------------------------------------------------------------------------------------------------------------------------------------------------------------------------------------------------------------------------------------------------------------------------------------------------------------------------------------------------------------|
| Journal:                        | <i>BMJ Open</i>                                                                                                                                                                                                                                                                                                                                                                                                                                                                                                                                          |
| Manuscript ID                   | bmjopen-2021-050316.R1                                                                                                                                                                                                                                                                                                                                                                                                                                                                                                                                   |
| Article Type:                   | Original research                                                                                                                                                                                                                                                                                                                                                                                                                                                                                                                                        |
| Date Submitted by the Author:   | 26-Mar-2021                                                                                                                                                                                                                                                                                                                                                                                                                                                                                                                                              |
| Complete List of Authors:       | Shah, Jasmit; The Aga Khan University Hospital Nairobi<br>Monroe-Wise, Aliza; University of Washington Seattle Campus<br>Talib, Zohray ; California University of Science and Medicine<br>Nabiswa, Alphonse; The Aga Khan University Hospital Nairobi<br>Said, Mohammed; Avenue Hospital<br>Abeid, Abdulaziz; Coast General Teaching and Referral Hospital<br>Ali Mohamed, Mohamed; Coast General Teaching and Referral Hospital<br>Mohamed, Sood; Coast General Teaching and Referral Hospital<br>Ali, Sayed; The Aga Khan University Hospital Nairobi, |
| <b>Primary Subject Heading</b>: | Mental health                                                                                                                                                                                                                                                                                                                                                                                                                                                                                                                                            |
| Secondary Subject Heading:      | Global health, Infectious diseases                                                                                                                                                                                                                                                                                                                                                                                                                                                                                                                       |
| Keywords:                       | COVID-19, Public health < INFECTIOUS DISEASES, MENTAL HEALTH, Depression & mood disorders < PSYCHIATRY                                                                                                                                                                                                                                                                                                                                                                                                                                                   |
|                                 |                                                                                                                                                                                                                                                                                                                                                                                                                                                                                                                                                          |

SCHOLARONE™  
Manuscripts

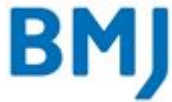

I, the Submitting Author has the right to grant and does grant on behalf of all authors of the Work (as defined in the below author licence), an exclusive licence and/or a non-exclusive licence for contributions from authors who are: i) UK Crown employees; ii) where BMJ has agreed a CC-BY licence shall apply, and/or iii) in accordance with the terms applicable for US Federal Government officers or employees acting as part of their official duties; on a worldwide, perpetual, irrevocable, royalty-free basis to BMJ Publishing Group Ltd ("BMJ") its licensees and where the relevant Journal is co-owned by BMJ to the co-owners of the Journal, to publish the Work in this journal and any other BMJ products and to exploit all rights, as set out in our [licence](#).

The Submitting Author accepts and understands that any supply made under these terms is made by BMJ to the Submitting Author unless you are acting as an employee on behalf of your employer or a postgraduate student of an affiliated institution which is paying any applicable article publishing charge ("APC") for Open Access articles. Where the Submitting Author wishes to make the Work available on an Open Access basis (and intends to pay the relevant APC), the terms of reuse of such Open Access shall be governed by a Creative Commons licence – details of these licences and which [Creative Commons](#) licence will apply to this Work are set out in our licence referred to above.

Other than as permitted in any relevant BMJ Author's Self Archiving Policies, I confirm this Work has not been accepted for publication elsewhere, is not being considered for publication elsewhere and does not duplicate material already published. I confirm all authors consent to publication of this Work and authorise the granting of this licence.

1  
2  
3 **MENTAL HEALTH DISORDERS AMONG HEALTH CARE WORKERS**  
4 **DURING THE COVID-19 PANDEMIC: A CROSS-SECTIONAL SURVEY**  
5 **FROM THREE MAJOR HOSPITALS IN KENYA.**  
6  
7  
8  
9

10 *Jasmit Shah, Aliza Monroe-Wise, Zohray Talib, Alphonse Nabiswa, Mohammed*  
11 *Said, Abdulaziz Abeid, Mohamed Ali Mohamed, Sood Mohamed, Sayed K Ali*  
12  
13  
14  
15  
16  
17  
18  
19  
20  
21  
22  
23  
24  
25  
26  
27  
28  
29  
30  
31  
32  
33  
34  
35  
36  
37  
38  
39  
40  
41  
42  
43  
44  
45  
46  
47  
48  
49  
50  
51  
52  
53  
54  
55  
56  
57  
58  
59  
60

1  
2  
3 Jasmit Shah, PhD  
4 Department of Medicine,  
5 Aga Khan University,  
6 3<sup>rd</sup> Parklands Avenue, Nairobi, Kenya  
7  
8

9 Aliza Monroe-Wise, MD  
10 Department of Global Health,  
11 University of Washington  
12 Seattle, WA 98195, USA  
13

14 Zohray Talib, MD  
15 Department of Medical Education,  
16 California University of Science and Medicine  
17 Colton, CA 92324, USA  
18  
19

20 Alphonse Nabiswa, MBChB  
21 Department of Medicine,  
22 Aga Khan University,  
23 3<sup>rd</sup> Parklands Avenue, Nairobi, Kenya  
24  
25

26 Mohammed Said, MMed  
27 Avenue Hospital,  
28 1<sup>st</sup> Parklands Avenue, Nairobi, Kenya  
29

30 Abdulaziz Abeid, MMed  
31 Department of Medicine  
32 Coast General Teaching and Referral Hospital,  
33 Kisauni Road, Mombasa, Kenya  
34  
35

36 Mohamed Ali Mohamed, MBChB  
37 Department of Medicine  
38 Coast General Teaching and Referral Hospital,  
39 Kisauni Road, Mombasa, Kenya  
40  
41

42 Sood Mohamed, MMed  
43 Coast General Teaching and Referral Hospital,  
44 Kisauni Road, Mombasa, Kenya  
45

46 Corresponding Author:

47 Sayed K Ali, MD  
48 Department of Medicine,  
49 Aga Khan University,  
50 3<sup>rd</sup> Parklands Avenue, Nairobi, Kenya  
51  
52  
53  
54  
55  
56  
57  
58  
59  
60



## ABSTRACT

### Background:

COVID-19 is an international global health emergency and has posed a great challenge to mental well-being and resilience. Little is known about the mental health impact of COVID-19 among HCWs in sub-Saharan Africa or other low-resource settings.

### Methods:

We conducted a cross-sectional study between August and November 2020 among HCWs recruited from three major hospitals in Kenya. The survey questionnaire consisted of six components- demographic and work title characteristics, information regarding care of COVID-19 patients, symptoms of depression, anxiety, insomnia, distress and burnout, measured using standardized questionnaires. Multivariable logistic regression analysis was performed to identify factors associated with mental health disorders.

### Results:

A total 433 (65.2% response rate) individuals agreed to participate in the survey. Median age was 32.75 years, 58.4% were females and 68.8% were frontline workers. Depression, anxiety, insomnia, distress, and burnout were reported in 53.6%, 44.3%, 41.1%, 31.0%, and 45.8% of all participants respectively. Frontline HCWs, females, and doctors were at higher risk of mental health symptoms. Nearly half of participants reported inadequate resources or training to care for COVID-19 patients, and those in the government hospital were more likely to report mental health symptoms.

## Conclusions:

To our knowledge, this is one of the first study looking at mental health outcomes among health care workers during the COVID-19 pandemic in Kenya. Similar to other studies from around the world, HCWs directly involved with COVID-19 patients reported higher rates of mental health symptoms. Mitigating strategies specific to Kenyan HCWs are urgently needed to help cope with mental health symptoms during the pandemic.

## Strengths and Limitations

- To the best of our knowledge, this is one of the first articles reporting the prevalence of mental health disorders among HCWs during the COVID-19 pandemic in Kenya.
- Mental health disorders were measured using specific standardized questionnaires.
- The study was conducted between the first and second waves of the virus outbreak and the results might not be suggestive of the long-term psychological disorders within our HCW population.
- There is need for cost-effective mitigating strategies to help curb the burden of mental health disorders associated with caring for COVID-19 patients in Kenya.

## BACKGROUND

The immense toll of the global SARS CoV-2 pandemic continues to rise, with over 87 million confirmed cases and almost 1.9 million deaths to date <sup>1</sup>. COVID-19 reached Kenya in March 2020, and as of December 2020, there were over 97,000 confirmed cases and 1,700 deaths <sup>1</sup>. COVID-19 has had a significant impact on the healthcare workforce. Increased work-load, long hours, inadequate personal protective equipment (PPE), the need to make ethically and morally difficult decisions, a lack of social support, isolation from and fear of infecting family members and oneself can have major impacts on the mental health of frontline workers <sup>2</sup>. Multiple recent studies conducted in Turkey, Singapore, India, Italy, Spain, China, Oman, and the United States have shown high rates of stress, depression, anxiety and burnout among healthcare workers (HCW) taking care of COVID-19 patients <sup>3-9</sup>. Other studies have shown higher rates of mental health disorders among HCWs caring for COVID-19 compared with those not caring for COVID-19 patients <sup>10-15</sup>. A global study done between April and May 2020 across 31 countries looking at mental health outcomes in HCWs during the initial stage of the pandemic, showed an overall prevalence of 60% anxiety and 53% depression. There were only 49 responses from eleven countries in Africa, including Kenya <sup>16</sup>. Risk factors for mental health symptoms among HCWs caring for COVID-19 patients include being female, young, single, having minimal work experience and working on the frontlines <sup>10</sup>. Unfortunately, the psychological impact of the COVID-19 pandemic has also resulted in HCWs suicides <sup>17</sup>.

Quality healthcare, especially during a pandemic, requires a robust health workforce with adequate numbers, optimal physical and mental well-being and a supportive environment. Many parts of Africa continue to struggle with the rising cases of COVID-19 amidst limited medical resources and infrastructure, inadequate health care workforce and minimal ICU beds. The Organization for

1  
2  
3 Economic Co-operation and Development (OECD) in 2020 reported 2.6 and 3 physicians and 11.9  
4 and 7.8 nurses per 1,000 people in the United States and United Kingdom respectively. Austria  
5 reported the most physicians (5.2) while Norway reported the most nurses (18) per 1,000 people  
6  
7  
8  
9  
10  
11  
12  
13  
14  
15  
16  
17  
18  
19  
20  
21  
22  
23  
24  
25  
26  
27  
28  
29  
30  
31  
32  
33  
34  
35  
36  
37  
18. Most recent corresponding figures from the WHO in Kenya were 0.2 physicians and 1.2 nurses  
per 1,000 people<sup>19</sup>. Additionally, Kenya has approximately 14 hospital beds per 10,000 people  
with 537 ICU beds and 256 ventilators serving a population of close to 50 million people<sup>19 20</sup>. In  
contrast, the WHO in 2019 reported 25 hospital beds per 10,000 people in the United Kingdom  
with a population of approximately 67 million people<sup>19</sup>. Many African countries have fragile  
health care systems with fewer than 30 critical care beds for their entire population and only a  
handful of fully trained critical care physicians, highlighting the lack of critical resources to  
adequately address the COVID-19 pandemic in Africa<sup>2 21</sup>. Mental health resources and providers  
are also lacking in Kenya. As of 2016, Kenya reported 0.18 psychiatrists and 0.002 psychologists  
per 10,000 people with less than 1% of the public sector having access to any form of mental health  
care services<sup>19 22</sup>. Furthermore, similar to other sub-Saharan African (SSA) countries, Kenya has  
no formal mental health response plan within the larger COVID-19 strategic response<sup>22</sup>.

38  
39  
40  
41  
42  
43  
44  
45  
46  
47  
48  
49  
50  
51  
52  
53  
54  
55  
56  
57  
58  
59  
60  
Historical experiences with deadly pandemics can offer invaluable lessons to resource limited  
settings. During the Ebola pandemic in Western Africa in the early parts of 2014, the pandemic  
swiftly crippled an already weak health care system, resulting in approximately 69% of HCWs  
deaths with anecdotal evidence of increasing mental health disorders among survivors<sup>23-25</sup>.  
However, few studies have been conducted on the association of the Ebola pandemic on HCWs  
mental health symptoms. Similarly, a year into the COVID-19 pandemic, little is known on the  
effect of the pandemic on the mental health of HCWs in SSA or in any resource-limited setting.  
We therefore aimed to measure the prevalence of mental health symptoms among HCWs in 3

1  
2  
3 major hospitals in Kenya, and to evaluate risk factors for mental health symptoms among HCWs  
4  
5 in these hospitals.  
6  
7  
8  
9

## 10 11 **METHODS**

### 12 13 14 **Study Design**

15  
16  
17 We carried out a cross sectional study between August and November, 2020.  
18

### 19 20 **Participants and Study Site**

21  
22 Physicians, including residents and fellows, and nurses were recruited from 1 government (Coast  
23  
24 General Teaching and Referral Hospital, Mombasa (CGTRH)) and 2 private hospitals (Aga Khan  
25  
26 University Hospital, Nairobi (AKUHN), and Avenue Hospital, Nairobi).  
27  
28

### 29 30 **Recruitment and Enrollment**

31  
32 Email addresses of all physicians and nurses in each hospital were obtained by the principal site  
33  
34 investigator in each hospital with help of the Information Technology Department. Physicians and  
35  
36 nurses were recruited from AKUHN, CGTRH and Avenue Hospital. Email invitations with a link  
37  
38 to a voluntary, de-identified survey were sent to 725 HCWs. Responses from HCW remained  
39  
40 anonymous.  
41  
42

### 43 44 **Ethical Approval**

45  
46 Approval for this study was obtained from the Institutional Ethics and Review Committee at the  
47  
48 Aga Khan University, Nairobi and the hospital leadership at CGTRH and Avenue Hospital. Online  
49  
50 consent was obtained from all the participants. Participants were allowed to withdraw from the  
51  
52 study at any time without any consequences. The survey was anonymous, and confidentiality of  
53  
54 information was assured. On conclusion of the survey, a score for each mental health disorder was  
55  
56  
57  
58  
59  
60

1  
2  
3 computed and shared with the participants. If the scores indicated a mental health issue, the  
4  
5 participants were directed to seek medical consultation with their primary care provider or the  
6  
7 counselling services at the respective hospitals. If any of the participants indicated suicidal or  
8  
9 homicidal ideations, they were directed to the mental health hotline at the Aga Khan University  
10  
11 Hospital or an assigned physician at the CGTRH and Avenue Hospital.  
12  
13

## 14 **Procedures**

15  
16 Online survey data were collected through the Research Electronic Data Capture - REDCap  
17  
18 platform (Vanderbilt and National Institute of Health) <sup>26</sup>. Email reminders were sent out twice a  
19  
20 week from REDCap for participation in the survey. Every participant received a unique link  
21  
22 allowing them to complete the survey only once. The survey questionnaire in English consisted  
23  
24 of six components: demographic characteristics (including job title, experiences providing care to  
25  
26 patients with COVID-19), and sections on symptoms of depression, anxiety, insomnia, distress  
27  
28 and burnout. On average the surveys took about five to seven minutes to complete. Mental health  
29  
30 symptoms were measured using validated questionnaires: the 9-item Patient Health Questionnaire  
31  
32 (PHQ-9) for depression <sup>27</sup>, the 7-item Generalized Anxiety Disorder Questionnaire (GAD-7) for  
33  
34 anxiety <sup>28</sup>, the 7-item Insomnia Severity Index Questionnaire (ISI) for insomnia <sup>29</sup>, the 22-item  
35  
36 Impact of Event Scale–Revised (IES-R) for distress <sup>30</sup> and the 16-item Stanford Professional  
37  
38 Fulfillment Index Questionnaire (SPFI) for burnout <sup>31</sup>. While the 22-item Impact of Event Scale–  
39  
40 Revised (IES-R) was initially designed for diagnosing post-traumatic stress disorder (PTSD), it  
41  
42 has been used in multiple recent studies to measure COVID-19-related psychological distress and  
43  
44 we have used it to measure general distress <sup>313</sup>. The cutoff score for detecting symptoms of major  
45  
46 depression, anxiety, insomnia, and distress were 10, 7, 15, and 26, respectively <sup>13</sup>. The categories  
47  
48 of the severity of each mental health disorder are presented in Table 1. Based on previously  
49  
50  
51  
52  
53  
54  
55  
56  
57  
58  
59  
60

1  
2  
3 published literature, we defined frontline HCWs as those HCWs who reported in providing direct  
4 care (diagnosing, treating or providing nursing care) as ‘frontline HCWs’. to COVID-19 patients  
5  
6  
7  
8<sup>13 15</sup>. HCWs who were not taking care of COVID-19 patients were mostly from the outpatient  
9  
10 clinics as well as the non-COVID wards.

### 11 12 **Statistical Analysis**

13  
14  
15 Categorical data were analyzed as frequencies and percentages whereas continuous data were  
16  
17 analyzed as medians with interquartile ranges (IQR). The nonparametric Kruskal-Wallis test was  
18  
19 utilized to compare the continuous variables and Fishers exact test was used to compare the  
20  
21 categorical variables between two groups. To determine potential risk factors for symptoms of  
22  
23 depression, anxiety, insomnia, distress, burnout and professional fulfillment in participants, a  
24  
25 multivariate logistic regression analysis was performed, and the associations between risk factors  
26  
27 and outcomes are presented as odds ratios (ORs) and 95% confidence intervals (CIs). The outcome  
28  
29 variables for the multivariate logistic regressions were mental health disorders dichotomized using  
30  
31 the standard cutoffs as above. Data analysis was performed using SPSS statistical software version  
32  
33 20.0 (IBM Corp). The significance level was set at  $\alpha = .05$ , and all tests were 2-tailed.  
34  
35  
36

### 37 38 **Patient and public involvement**

39  
40 Patients or the public were not involved in the research design, reporting, or survey dissemination  
41  
42 strategies of this study.  
43  
44  
45

## 46 47 **RESULTS**

48  
49 Of the 725 invited HCWs across the three hospitals, 473 (65.2%) responded to the survey and 433  
50  
51 (91.5%, overall: 59.7%) consented to complete the survey (Table 2). The median age of the  
52  
53 participants was 32.8 years (IQR: 29.71, 36.75). Of the 433 responding participants, 253 (58.4%)  
54  
55 were females, and 244 (56.7%) were married. Most of the participants were medical doctors (243  
56  
57  
58  
59  
60

1  
2  
3 [56.1%]) and of African ethnicity (354 [82.5%]). A total of 298 participants (68.8%) were frontline  
4  
5 HCWs directly engaged in COVID-19 care and treatment. Of the frontline workers, 122 (41.1%)  
6  
7 had cared for about 5-20 patients and 174 (58.8%) had lost a patient to COVID-19. Only 3.7% of  
8  
9 all participants reported a prior history or diagnosis of any mental health disorder.

10  
11  
12 Using the standardized screening tools, depression, anxiety, insomnia, distress, and burnout were  
13  
14 reported in 53.6%, 44.3%, 41.1%, 31.0%, and 45.8% of all participants, respectively. Severe  
15  
16 symptoms of depression, anxiety, insomnia, distress, and burnout were more commonly reported  
17  
18 among frontline HCWs than colleagues who were not frontline HCWs. For example, severe  
19  
20 depression was reported among 11.6% of frontline HCWs (n=34) compared with 3.8% (n=5)  
21  
22 among workers not directly caring for COVID-19 patients (p <0.001, Table 3). The questionnaires  
23  
24 demonstrated good internal consistency with a Cronbach alpha of 0.904, 0.912, 0.896, 0.971 and  
25  
26 0.935 for PHQ-9, GAD-7, ISI, IES-R and SPFI respectively.

27  
28  
29  
30  
31 Multivariate logistic regression analysis showed that after adjustment, working on the frontlines  
32  
33 was an independent risk variable for all the mental health disorders (depression, OR 3.55; 95% CI,  
34  
35 1.77-7.11; p<0.001; anxiety, OR 2.51; 95% CI, 1.20-5.25; p=0.014; insomnia, OR 4.45; 95% CI,  
36  
37 1.51-13.10; p=0.007; distress: OR, 1.89, 95% CI, 1.10-3.17; p=0.021 and burnout: OR, 2.74, 95%  
38  
39 CI, 1.69-4.42; p<0.001). Furthermore, being a doctor and being a female were associated with  
40  
41 severe symptoms of depression and anxiety, with an OR of 1.95 for severe depression among  
42  
43 women compared with men, (95% CI, 1.12-3.42; p=0.019) and an OR of 2.29 for severe anxiety  
44  
45 among doctors compared with nurses (95% CI, 1.21-4.32; p=0.011) (Table 4).

46  
47  
48  
49 Nearly half of frontline workers stated that they lacked adequate resources and PPE to care for  
50  
51 COVID-19 patients, and fewer felt that they needed additional training to take care of or treat  
52  
53 COVID-19 patients (resources: 45.8%, trained: 46.0%). On further analysis, we found that HCWs  
54  
55  
56  
57  
58  
59  
60



1  
2  
3 employed in public institutions were more likely to report having inadequate resources than those  
4  
5 in the private hospital (OR 14.55, 95% CI, 5.99-35.34;  $p < 0.001$ ), and were more likely to report  
6  
7 being inadequately trained (OR 3.61, 95% CI, 1.91-6.81;  $p < 0.001$ ).  
8  
9

10 Furthermore, respondents from the public institution reported experiencing more moderate to  
11  
12 severe symptom levels of depression, anxiety, insomnia, and distress (eg, moderate and severe  
13  
14 depression among private vs public: 67 [18.7%] vs 22 [32.4%];  $p = 0.014$ , moderate and severe  
15  
16 anxiety among private vs public: 43 [12.3%] vs 19 [28.3%];  $p = 0.008$ ; moderate and severe  
17  
18 insomnia among private vs public: 30 [8.5%] vs 15 [22.4%];  $p = 0.004$  and distress among private  
19  
20 vs public: 62 [17.8%] vs 21 [33.3%];  $p = 0.014$ ) (Table 5).  
21  
22  
23  
24  
25

## 26 DISCUSSION

27  
28  
29 To our knowledge, this is among the first studies to investigate mental health disorders among  
30  
31 HCWs during the COVID-19 pandemic in Kenya, or to evaluate the associations between COVID-  
32  
33 19 and mental health symptoms in any resource-limited setting in sub-Saharan Africa. Our study  
34  
35 examined HCWs in one government and two private hospitals in Kenya actively involved in the  
36  
37 care of COVID-19 patients. Two of the institutions were located in Nairobi and one in Mombasa;  
38  
39 both major cities have been greatly affected by COVID-19.  
40  
41  
42  
43

44 Despite only 3.7% reporting ever having mental health disorders previously, our study reported  
45  
46 higher rates of depression, anxiety, insomnia, distress, and burnout. Similar to studies conducted  
47  
48 in other countries, being a frontline worker was associated with higher scores for depression,  
49  
50 anxiety, insomnia, distress and burnout. Our study also showed that being a female and a doctor  
51  
52 was significantly associated with severe symptoms of depression and anxiety. This is in contrast  
53  
54 to other studies in which nurses experienced more psychological symptoms associated with caring  
55  
56  
57  
58  
59  
60

1  
2  
3 for COVID-19 patients <sup>5 13 32</sup>. This specific finding needs further research to understand if there is  
4 a cultural aspect related to this and whether level of knowledge and education plays a role in the  
5 anxiety level of different HCWs.  
6  
7  
8  
9

10 The median age of our study population was 32.8 years. Our study did not find an association  
11 between HCWs' age and mental health disorders (comparing the median values of age) but age  
12 was significantly negatively correlated with mental health disorders (range -0.118 to -0.179) which  
13 was similar to findings from other studies <sup>11 15 33</sup>. Furthermore, although methods vary slightly in  
14 different studies, our study showed higher overall percentages of depression, anxiety, and insomnia  
15 among frontline HCWs that have been found in other studies conducted in higher income countries  
16 using the same validated scales and diagnostic criteria <sup>3 6 11-15</sup>. This important finding in our setting  
17 could be attributed to the limited resources and lack of mitigating strategies such as a formal mental  
18 health response plan, readily available mental health services, regulation of work hours and  
19 adequate medical resources in Kenya.  
20  
21  
22  
23  
24  
25  
26  
27  
28  
29  
30  
31  
32  
33

34 A recent study on mental health disorders among trainees at three American academic medical  
35 centers found that trainees taking care of COVID-19 patients had higher rates of burnout compared  
36 to those not taking care of COVID-19 patients, but found no significant difference in professional  
37 fulfillment scores <sup>34</sup>. On the contrary, a study in Turkey showed a lower level of burnout in  
38 physicians taking care of COVID-19 patients compared with physicians who took care of non  
39 COVID-19 patients <sup>35</sup>. In our study, we found statistically higher rates of burnout among all cadres  
40 of HCWs at all institutions taking care of COVID-19 patients compared to those not taking care  
41 of COVID-19 patients. We found no statistical difference in professional fulfillment scores.  
42  
43  
44  
45  
46  
47  
48  
49  
50  
51  
52

53 Overall, we found that half of the respondents felt inadequately trained and reported lack of enough  
54 resources and PPE to safely care for COVID-19 patients. A study looking at HCW knowledge,  
55  
56  
57  
58  
59  
60

1  
2  
3 attitude and practices in Uganda found that 69% reported sufficient knowledge and 74% had a  
4 positive attitude around COVID-19 <sup>36</sup>. Similarly, Mbachu and colleagues reported excellent  
5 knowledge and good preventative practices towards COVID-19 in Nigeria <sup>37</sup>.  
6  
7  
8  
9

10 In our study, HCWs at the government hospital felt less trained with inadequate resources and PPE  
11 to take care of COVID-19 patients than those in the private hospitals. Most government hospitals  
12 have generally few resources as compared to private institutes that are often hard to quantify. The  
13 government hospitals are of various levels and resources greatly vary depending on their  
14 geographic locations in the country. Also due to the limited health care resources, patients are  
15 admitted to the hospitals based on the location and availability and not due to severity. The higher  
16 severity patients are admitted on both private and governmental institutes. Mbachu and colleagues  
17 showed that a lack of PPE had a negative impact on the attitudes of HCWs in Nigeria <sup>37</sup>. Likewise,  
18 in our study, HCWs in the government institution also showed significantly higher rates of  
19 depression, anxiety, insomnia and distress than those in the private hospitals. We could find no  
20 other study comparing mental health outcomes between private and government hospital in our or  
21 any other settings. In addition to the absence of mitigating strategies unique to HCWs taking care  
22 of COVID-19 patients, our findings also stress the importance of adequate medical personnel,  
23 training, critical care beds and other key resources to help fortify fragile health care systems within  
24 many African countries and to better tackle the COVID-19 pandemic.  
25  
26  
27  
28  
29  
30  
31  
32  
33  
34  
35  
36  
37  
38  
39  
40  
41  
42  
43  
44  
45

46 Like many other countries in SSA, Kenya lacks a formal mental health response plan to the  
47 COVID-19 pandemic <sup>22</sup>. Some researcher in Kenya has called for key recommendations to help  
48 strengthen the mental health response to COVID-19 including a dynamic mental health response  
49 plan designed by mental health experts specific to the needs of the country and grassroots training  
50 of community health workers and volunteers, especially HIV counsellors and retired nurses,  
51  
52  
53  
54  
55  
56  
57  
58  
59  
60

1  
2  
3 remains key not only to target the population at large but also to focus on providing key mental  
4 health services to HCWs in institutions across the country <sup>2 22</sup> . Like many other African countries,  
5  
6 regular press releases on television and radios are used to disseminate key information on COVID-  
7  
8 19 in Kenya <sup>38</sup> . These platforms can be used to educate the population on COVID-19 but also to  
9  
10 demystify the stigma around seeking mental health services related to COVID-19. Of note, Kenya  
11  
12 has a 91% penetration of mobile subscriptions allowing the use of mobile health applications to  
13  
14 further enhance the delivery of care not only to the local population, but also health care workers  
15  
16 <sup>22</sup> . In addition, toll-free mental health helplines could be a key step to improving access to mental  
17  
18 health services especially for specific populations such as HCWs providing care to COVID-19  
19  
20 patients <sup>38</sup> . Senior leadership at every hospital, with the support of the government and donor  
21  
22 organizations, should seek creative ways to enhance the mental health capabilities and resources  
23  
24 especially for HCWs taking care of COVID-19 patients. This includes either investing in training  
25  
26 and capacity building opportunities or sharing resources among various hospitals geographically  
27  
28 and electronically to better support the response process. Providing daily allowances to frontline  
29  
30 HCWs, additional tax relief, as well as publicly acknowledging their heroic efforts might be ways  
31  
32 to boost morale and improve mental health outcomes in limited resource settings <sup>2</sup> .  
33  
34  
35  
36  
37  
38  
39

40 Our study has several limitations. It was conducted in one government hospital in Mombasa and  
41  
42 two private hospitals in Nairobi, with different funding structures. This was a cross-sectional  
43  
44 survey and the responses were not equally distributed among the HCW cadres, which could bias  
45  
46 the results. This may have occurred due to higher email utilization among doctors than among  
47  
48 nurses. Also being a cross-sectional survey, the study could only describe the prevalence of mental  
49  
50 health symptoms. Our study was conducted between the first and second waves of the virus  
51  
52 outbreak and our results might not be suggestive of the long-term psychological disorders within  
53  
54  
55  
56  
57  
58  
59

1  
2  
3 our HCW population. We also did not ask the participants if they had contracted COVID-19  
4 themselves or if they had unprotected exposure to COVID-19. Electronic mail with frequent  
5 reminders was only used, which could have potentially limited our response rate. Lastly, there may  
6 have been a response bias in that the non-responders may have been suffering from mental health  
7 symptoms, limiting the motivation to respond.  
8  
9  
10  
11  
12  
13

## 14 15 **CONCLUSION**

16 Our study, the first conducted in Kenya and one of the first in a low-resource healthcare setting,  
17 shows markedly higher rates of mental health disorders including depression and anxiety in all  
18 health care workers taking care of COVID-19 patients than those not caring for COVID-19  
19 patients, and higher rates than those reported in higher-income countries. Being a doctor and a  
20 female were associated with severe symptoms of depression and anxiety. Furthermore, HCWs in  
21 the government institution experienced higher rates of mental health symptoms than their  
22 counterparts in private institutions. This study highlights the urgent need for cost-effective, easy  
23 to replicate and rapid to implement mitigating strategies to help curb the burden of mental health  
24 disorders associated with caring for COVID-19 patients in Kenya and other resource-limited  
25 countries. Special attention should be paid to HCWs in the government hospitals.  
26  
27  
28  
29  
30  
31  
32  
33  
34  
35  
36  
37  
38  
39  
40  
41  
42  
43  
44  
45  
46  
47  
48  
49  
50  
51  
52  
53  
54  
55  
56  
57  
58  
59  
60

## REFERENCES

1. World Health Organization. WHO Coronavirus Disease (COVID-19) Dashboard [Available from: <https://covid19.who.int/> accessed 9 Jan 2021.
2. Chersich MF, Gray G, Fairlie L, et al. COVID-19 in Africa: care and protection for frontline healthcare workers. *Globalization and health* 2020;16(1):46. doi: 10.1186/s12992-020-00574-3 [published Online First: 2020/05/18]
3. Chew NWS, Lee GKH, Tan BYQ, et al. A multinational, multicentre study on the psychological outcomes and associated physical symptoms amongst healthcare workers during COVID-19 outbreak. *Brain, behavior, and immunity* 2020;88:559-65. doi: 10.1016/j.bbi.2020.04.049 [published Online First: 2020/04/25]
4. Shechter A, Diaz F, Moise N, et al. Psychological distress, coping behaviors, and preferences for support among New York healthcare workers during the COVID-19 pandemic. *General hospital psychiatry* 2020;66:1-8. doi: 10.1016/j.genhosppsych.2020.06.007 [published Online First: 2020/06/27]
5. Pappa S, Ntella V, Giannakas T, et al. Prevalence of depression, anxiety, and insomnia among healthcare workers during the COVID-19 pandemic: A systematic review and meta-analysis. *Brain, behavior, and immunity* 2020;88:901-07. doi: 10.1016/j.bbi.2020.05.026 [published Online First: 2020/05/22]
6. Bohlken J, Schömig F, Lemke MR, et al. [COVID-19 Pandemic: Stress Experience of Healthcare Workers - A Short Current Review]. *Psychiatrische Praxis* 2020;47(4):190-97. doi: 10.1055/a-1159-5551 [published Online First: 2020/04/28]
7. Martínez-López J, Lázaro-Pérez C, Gómez-Galán J, et al. Psychological Impact of COVID-19 Emergency on Health Professionals: Burnout Incidence at the Most Critical Period in Spain. *Journal of clinical medicine* 2020;9(9) doi: 10.3390/jcm9093029 [published Online First: 2020/09/24]
8. Liu X, Chen J, Wang D, et al. COVID-19 Outbreak Can Change the Job Burnout in Health Care Professionals. *Frontiers in psychiatry* 2020;11:563781. doi: 10.3389/fpsy.2020.563781 [published Online First: 2020/12/29]
9. Khasne RW, Dhakulkar BS, Mahajan HC, et al. Burnout among Healthcare Workers during COVID-19 Pandemic in India: Results of a Questionnaire-based Survey. *Indian journal of critical care medicine : peer-reviewed, official publication of Indian Society of Critical Care Medicine* 2020;24(8):664-71. doi: 10.5005/jp-journals-10071-23518 [published Online First: 2020/10/08]
10. Elbay RY, Kurtulmuş A, Arpacioğlu S, et al. Depression, anxiety, stress levels of physicians and associated factors in Covid-19 pandemics. *Psychiatry research* 2020;290:113130. doi: 10.1016/j.psychres.2020.113130 [published Online First: 2020/06/05]
11. Rossi R, Soccì V, Pacitti F, et al. Mental Health Outcomes Among Frontline and Second-Line Health Care Workers During the Coronavirus Disease 2019 (COVID-19) Pandemic in Italy. *JAMA network open* 2020;3(5):e2010185. doi: 10.1001/jamanetworkopen.2020.10185 [published Online First: 2020/05/29]
12. Evanoff BA, Strickland JR, Dale AM, et al. Work-Related and Personal Factors Associated With Mental Well-Being During the COVID-19 Response: Survey of Health Care and Other Workers. *Journal of medical Internet research* 2020;22(8):e21366. doi: 10.2196/21366 [published Online First: 2020/08/09]
13. Lai J, Ma S, Wang Y, et al. Factors Associated With Mental Health Outcomes Among Health Care Workers Exposed to Coronavirus Disease 2019. *JAMA network open* 2020;3(3):e203976. doi: 10.1001/jamanetworkopen.2020.3976 [published Online First: 2020/03/24]

14. Zhang WR, Wang K, Yin L, et al. Mental Health and Psychosocial Problems of Medical Health Workers during the COVID-19 Epidemic in China. *Psychotherapy and psychosomatics* 2020;89(4):242-50. doi: 10.1159/000507639 [published Online First: 2020/04/10]
15. Badahdah A, Khamis F, Al Mahyijari N, et al. The mental health of health care workers in Oman during the COVID-19 pandemic. *The International journal of social psychiatry* 2020:20764020939596. doi: 10.1177/0020764020939596 [published Online First: 2020/07/09]
16. Htay MNN, Marzo RR, AlRifai A, et al. Immediate impact of COVID-19 on mental health and its associated factors among healthcare workers: A global perspective across 31 countries. *Journal of global health* 2020;10(2):020381. doi: 10.7189/jogh.10.020381 [published Online First: 2020/11/21]
17. Watkins A, Rothfeld M, Rashbaum WK, et al. Top E.R. Doctor Who Treated Virus Patients Dies by Suicide. *New York Times* 2020 27 April 2020.
18. OECD. OECD Health Indicators, OECD [Available from: <https://data.oecd.org/health.htm> accessed 9 Jan 2021.
19. World Health Organization. The Global Health Observatory [23 Dec]. Available from: <http://www.who.int/hrh/statistics/hwfstats/> accessed 2020.
20. Barasa EW, Ouma PO, Okiro EA. Assessing the hospital surge capacity of the Kenyan health system in the face of the COVID-19 pandemic. *PloS one* 2020;15(7):e0236308-e08. doi: 10.1371/journal.pone.0236308
21. Murthy S, Leligdowicz A, Adhikari NK. Intensive care unit capacity in low-income countries: a systematic review. *PloS one* 2015;10(1):e0116949. doi: 10.1371/journal.pone.0116949 [published Online First: 2015/01/27]
22. Jaguga F, Kwobah E. Mental health response to the COVID-19 pandemic in Kenya: a review. *International journal of mental health systems* 2020;14:68. doi: 10.1186/s13033-020-00400-8 [published Online First: 2020/08/22]
23. Kamara S, Walder A, Duncan J, et al. Mental health care during the Ebola virus disease outbreak in Sierra Leone. *Bulletin of the World Health Organization* 2017;95(12):842-47. doi: 10.2471/blt.16.190470 [published Online First: 2017/12/05]
24. International Medical Corps. Assessment of Mental Health and Psychosocial Support (MHPSS) Needs and Resources in the Context of Ebola 2014 [Available from: <http://ebolacommunicationnetwork.org/wp-content/uploads/2015/01/IMC-Sierra-Leone-Dec-2014-Ebola-MHPSS-Assessment.pdf> accessed 9 Jan 2021.
25. World Health Organization. Health worker Ebola infections in Guinea, Liberia and Sierra Leone 2015 [Available from: [https://www.who.int/hrh/documents/21may2015\\_web\\_final.pdf](https://www.who.int/hrh/documents/21may2015_web_final.pdf) accessed 9 Jan 2021.
26. Harris PA, Taylor R, Minor BL, et al. The REDCap consortium: Building an international community of software platform partners. *Journal of biomedical informatics* 2019;95:103208. doi: 10.1016/j.jbi.2019.103208 [published Online First: 2019/05/13]
27. Kroenke K, Spitzer RL, Williams JB. The PHQ-9: validity of a brief depression severity measure. *Journal of general internal medicine* 2001;16(9):606-13. doi: 10.1046/j.1525-1497.2001.016009606.x [published Online First: 2001/09/15]
28. Spitzer RL, Kroenke K, Williams JB, et al. A brief measure for assessing generalized anxiety disorder: the GAD-7. *Archives of internal medicine* 2006;166(10):1092-7. doi: 10.1001/archinte.166.10.1092 [published Online First: 2006/05/24]
29. Morin CM, Belleville G, Bélanger L, et al. The Insomnia Severity Index: psychometric indicators to detect insomnia cases and evaluate treatment response. *Sleep* 2011;34(5):601-8. doi: 10.1093/sleep/34.5.601 [published Online First: 2011/05/03]

- 1  
2  
3 30. Motlagh H. Impact of Event Scale-revised. *Journal of physiotherapy* 2010;56(3):203. doi:  
4 10.1016/s1836-9553(10)70029-1 [published Online First: 2010/08/28]  
5  
6 31. Trockel M, Bohman B, Lesure E, et al. A Brief Instrument to Assess Both Burnout and Professional  
7 Fulfillment in Physicians: Reliability and Validity, Including Correlation with Self-Reported  
8 Medical Errors, in a Sample of Resident and Practicing Physicians. *Academic psychiatry : the*  
9 *journal of the American Association of Directors of Psychiatric Residency Training and the*  
10 *Association for Academic Psychiatry* 2018;42(1):11-24. doi: 10.1007/s40596-017-0849-3  
11 [published Online First: 2017/12/03]  
12 32. Tan BYQ, Chew NWS, Lee GKH, et al. Psychological Impact of the COVID-19 Pandemic on Health Care  
13 Workers in Singapore. *Annals of internal medicine* 2020;173(4):317-20. doi: 10.7326/m20-1083  
14 [published Online First: 2020/04/07]  
15 33. Youssef N, Mostafa A, Ezzat R, et al. Mental health status of health-care professionals working in  
16 quarantine and non-quarantine Egyptian hospitals during the COVID-19 pandemic. *Eastern*  
17 *Mediterranean health journal = La revue de sante de la Mediterranee orientale = al-Majallah al-*  
18 *sihhiyah li-sharq al-mutawassit* 2020;26(10):1155-64. doi: 10.26719/emhj.20.116 [published  
19 Online First: 2020/10/27]  
20 34. Kannampallil TG, Goss CW, Evanoff BA, et al. Exposure to COVID-19 patients increases physician  
21 trainee stress and burnout. *PLoS one* 2020;15(8):e0237301. doi: 10.1371/journal.pone.0237301  
22 [published Online First: 2020/08/08]  
23 35. Dinibutun SR. Factors Associated with Burnout Among Physicians: An Evaluation During a Period of  
24 COVID-19 Pandemic. *Journal of healthcare leadership* 2020;12:85-94. doi: 10.2147/jhl.S270440  
25 [published Online First: 2020/09/29]  
26 36. Olum R, Chekwech G, Wekha G, et al. Coronavirus Disease-2019: Knowledge, Attitude, and Practices  
27 of Health Care Workers at Makerere University Teaching Hospitals, Uganda. *Frontiers in public*  
28 *health* 2020;8:181. doi: 10.3389/fpubh.2020.00181 [published Online First: 2020/05/20]  
29 37. Mbachu CNP, Azubuike CM, Mbachu, II, et al. COVID-19 infection: Knowledge, attitude, practices,  
30 and impact among healthcare workers in a South-Eastern Nigerian state. *Journal of infection in*  
31 *developing countries* 2020;14(9):943-52. doi: 10.3855/jidc.13248 [published Online First:  
32 2020/10/09]  
33 38. Semo BW, Frissa SM. The Mental Health Impact of the COVID-19 Pandemic: Implications for Sub-  
34 Saharan Africa. *Psychology research and behavior management* 2020;13:713-20. doi:  
35 10.2147/prbm.S264286 [published Online First: 2020/09/29]  
36  
37  
38  
39  
40  
41  
42  
43  
44  
45  
46  
47  
48  
49  
50  
51  
52  
53  
54  
55  
56  
57  
58  
59  
60



## ABBREVIATIONS

|        |                                                        |
|--------|--------------------------------------------------------|
| PPE    | Personal protective equipment                          |
| HCW    | Healthcare worker                                      |
| ICU    | Intensive care unit                                    |
| OECD   | Organization for Economic Co-operation and Development |
| WHO    | World Health Organization                              |
| SSA    | sub-Saharan Africa                                     |
| CGTRH  | Coast General Teaching and Referral Hospital, Mombasa  |
| AKUHN  | Aga Khan University Hospital, Nairobi                  |
| REDCap | Research Electronic Data Capture                       |
| PHQ    | Patient Health Questionnaire                           |
| GAD    | Generalized Anxiety Disorder                           |
| ISI    | Insomnia Severity Index                                |
| IES-R  | Impact of Event Scale–Revised                          |
| SPFI   | Stanford Professional Fulfillment Index                |
| IQR    | Interquartile ranges                                   |
| OR     | Odds Ratio                                             |
| CI     | Confidence Interval                                    |

## FOOTNOTES

**Contributors:** SKA developed the concept study and proposal, supervised the overall project and coordinated the study at AKUHN. AMW, ZT, and AN assisted in the study concept, design and editing of the survey. MS supervised data collection at the Avenue Hospital. AA, MAM and SM supervised the data collection at CGTRH. SKA and JS verified the underlying data. JS did the data analysis. JS and SA wrote the first draft of the paper. All authors reviewed, edited and provided comments on the first and subsequent drafts. All authors reviewed and approved the final manuscript.

1  
2  
3 **Funding:** This research did not receive any specific grant from any funding agencies.  
4  
5

6 **Competing interests:** The authors declare that they have no competing interests.  
7  
8

9  
10 **Patient and public involvement:** Patients and/or the public were not involved in the design, or  
11 conduct, or reporting, or dissemination plans of this research.  
12  
13

14  
15 **Patient consent for publication:** Not required  
16  
17

18 **Ethical approval:** Approval for this study was obtained from the Institutional Ethics and Review  
19 Committee at the Aga Khan University, Nairobi and the hospital leadership at CGTRH and Avenue  
20 Hospital.  
21  
22  
23

24  
25 **Data availability statement:** All participant data used in this research are anonymous. Participant  
26 data used for analysis are available on reasonable request from corresponding author, Sayed K.  
27 Ali at [sayed.karar@aku.edu](mailto:sayed.karar@aku.edu).  
28  
29  
30  
31  
32  
33  
34  
35  
36  
37  
38  
39  
40  
41  
42  
43  
44  
45  
46  
47  
48  
49  
50  
51  
52  
53  
54  
55  
56  
57  
58  
59  
60

---

**Scoring Categories for Mental Health Disorders**


---

**PHQ-9 (Depression)**

Normal (0 – 4)

Mild (5 – 9)

Moderate (10 – 14)

Severe (15 – 27)

*Binary Cut off - 10***IES-R (Distress)**

Normal (0 – 8)

Mild (9 – 25)

Moderate (26 – 43)

Severe (44 – 88)

*Binary Cut off - 26***GAD-7 (Anxiety)**

Normal (0 – 4)

Mild (5 – 9)

Moderate (10 – 14)

Severe (15 – 21)

*Binary Cut off - 7***SPFI (Burnout)**

Yes ( &gt; 1.33 )

No ( ≤ 1.33 )

**SPFI (Professional Fulfillment)**

Yes ( &gt; 3.0 )

No ( ≤ 3.0 )

**ISI (Insomnia)**

Normal (0 – 7)

Subthreshold (8 – 14)

Moderate (15 – 21)

Severe (22 – 28)

*Binary Cut off - 15*


---

 Table 1: Scoring categories for the mental health disorders
 

---

| <b>Characteristics</b>                       | <b>N (%)</b>         |
|----------------------------------------------|----------------------|
| Age (years) (n = 401) (median [IQR])         | 32.75 [29.71, 36.75] |
| Gender                                       |                      |
| Male                                         | 176 (40.6%)          |
| Female                                       | 253 (58.4%)          |
| Prefer not to disclose                       | 4 (1.0%)             |
| Marital Status (n = 430)                     |                      |
| Single                                       | 172 (40.0%)          |
| Married                                      | 244 (56.7%)          |
| Other                                        | 14 (3.3%)            |
| Ethnicity (n = 429)                          |                      |
| African                                      | 354 (82.5%)          |
| Asian                                        | 51 (11.9%)           |
| Other                                        | 24 (5.6%)            |
| Health Care Profession                       |                      |
| Nurses                                       | 190 (43.9%)          |
| Doctors                                      | 243 (56.1%)          |
| Direct care COVID                            |                      |
| Yes                                          | 298 (68.8%)          |
| No                                           | 135 (31.2%)          |
| Patients cared (n = 297)                     |                      |
| < 5 Patients                                 | 101 (34.0%)          |
| 5 - 20 Patients                              | 122 (41.1%)          |
| > 20 Patients                                | 74 (24.9%)           |
| Lost any patients (n = 296)                  |                      |
| Yes                                          | 174 (58.8%)          |
| No                                           | 122 (41.2%)          |
| Enough Resources to care for COVID (n = 297) |                      |
| Yes                                          | 161 (54.2%)          |
| No                                           | 136 (45.8%)          |
| Adequately Trained for COVID (n = 298)       |                      |
| Yes                                          | 161 (54.0%)          |
| No                                           | 137 (46.0%)          |
| History of Mental Health Disorder            |                      |
| Yes                                          | 16 (3.70%)           |
| No                                           | 398 (91.9%)          |
| Not Sure                                     | 15 (3.4%)            |
| Prefer not to disclose                       | 4 (1.0%)             |
| Diagnosis (n = 15)                           |                      |
| Anxiety                                      | 5 (33.3%)            |
| Depression                                   | 7 (46.7%)            |
| Epilepsy                                     | 1 (6.7%)             |

|                     |                        |           |
|---------------------|------------------------|-----------|
|                     | Depression and Anxiety | 2 (13.3%) |
| Still have symptoms |                        |           |
|                     | Yes                    | 8 (50.0%) |
|                     | No                     | 8 (50.0%) |

Table 2: Baseline characteristics of study participants (N = 433)

For peer review only

| Variable                               | Adj OR <sup>a</sup>         | (95% CI)             | P Value | Variable                                                         | Adj OR <sup>a</sup>  | (95% CI) | P Value        |
|----------------------------------------|-----------------------------|----------------------|---------|------------------------------------------------------------------|----------------------|----------|----------------|
| <b>PHQ-9: Depression</b>               |                             |                      |         | <b>IES-R: Distress</b>                                           |                      |          |                |
| <i>Gender</i>                          |                             |                      |         | <i>Gender</i>                                                    |                      |          |                |
| Male                                   | 1 [Reference]               |                      | N/A     | Male                                                             | 1 [Reference]        |          | N/A            |
| <b>Total</b>                           |                             |                      |         | <b>Have you ever directly cared for a patient with COVID-19?</b> |                      |          |                |
|                                        |                             |                      |         | <b>Yes</b>                                                       | <b>No</b>            |          | <b>P Value</b> |
| <b><u>Depression</u></b>               |                             | <b>(n = 425)</b>     |         | <b>(n = 292)</b>                                                 | <b>(n = 133)</b>     |          |                |
| <b><i>PHQ-9</i></b>                    | None                        | 197 (46.4%)          |         | 116 (39.7%)                                                      | 81 (60.9%)           |          |                |
|                                        | Mild                        | 139 (32.7%)          |         | 99 (33.9%)                                                       | 40 (30.1%)           |          | <0.001         |
|                                        | Moderate                    | 50 (11.8%)           |         | 43 (14.7%)                                                       | 7 (5.3%)             |          |                |
|                                        | Severe                      | 39 (9.2%)            |         | 34 (11.6%)                                                       | 5 (3.8%)             |          |                |
| <b><u>Anxiety</u></b>                  |                             | <b>(n = 418)</b>     |         | <b>(n = 287)</b>                                                 | <b>(n = 131)</b>     |          |                |
| <b><i>GAD-7</i></b>                    | Minimal                     | 208 (49.8%)          |         | 131 (45.6%)                                                      | 77 (58.8%)           |          |                |
|                                        | Mild                        | 148 (35.4%)          |         | 104 (36.2%)                                                      | 44 (33.6%)           |          | 0.017          |
|                                        | Moderate                    | 33 (7.9%)            |         | 27 (9.4%)                                                        | 6 (4.6%)             |          |                |
|                                        | Severe                      | 29 (6.9%)            |         | 25 (8.7%)                                                        | 4 (3.1%)             |          |                |
| <b><u>Insomnia</u></b>                 |                             | <b>(n = 418)</b>     |         | <b>(n = 287)</b>                                                 | <b>(n = 131)</b>     |          |                |
| <b><i>ISI</i></b>                      | None                        | 246 (58.9%)          |         | 156 (54.4%)                                                      | 90 (68.7%)           |          |                |
|                                        | Subthreshold                | 127 (30.4%)          |         | 90 (31.4%)                                                       | 37 (28.2%)           |          | 0.001          |
|                                        | Moderate                    | 39 (9.3%)            |         | 36 (12.5%)                                                       | 3 (2.3%)             |          |                |
|                                        | Severe                      | 6 (1.4%)             |         | 5 (1.7%)                                                         | 1 (0.8%)             |          |                |
| <b><u>Distress</u></b>                 |                             | <b>(n = 410)</b>     |         | <b>(n = 281)</b>                                                 | <b>(n = 129)</b>     |          |                |
| <b><i>IESR</i></b>                     | Normal                      | 283 (69.0%)          |         | 185 (65.8%)                                                      | 98 (76.0%)           |          |                |
|                                        | Mild                        | 44 (10.7%)           |         | 28 (10.0%)                                                       | 16 (12.4%)           |          | 0.008          |
|                                        | Moderate                    | 24 (5.9%)            |         | 17 (6.0%)                                                        | 7 (5.4%)             |          |                |
|                                        | Severe                      | 59 (14.4%)           |         | 51 (18.1%)                                                       | 8 (6.2%)             |          |                |
|                                        | Avoidance Subscale          | 0.80 [0.10, 1.40]    |         | 0.90 [0.10, 1.80]                                                | 0.60 [0.00, 1.10]    |          | 0.032          |
|                                        | Intrusion Subscale          | 0.65 [0.10, 1.30]    |         | 0.80 [0.10, 1.50]                                                | 0.60 [0.00, 1.10]    |          | 0.065          |
|                                        | Hyperarousal Subscale       | 0.40 [0.00, 1.20]    |         | 0.50 [0.20, 1.30]                                                | 0.30 [0.00, 0.80]    |          | 0.041          |
| <b><u>SPFI</u></b>                     |                             | <b>(n = 404)</b>     |         | <b>(n = 278)</b>                                                 | <b>(n = 126)</b>     |          |                |
|                                        | Professional Fulfillment    | 54.17 [37.50, 75.00] |         | 50.00 [33.33, 75.00]                                             | 58.33 [45.83, 75.00] |          | <0.001         |
|                                        | Work Exhaustion             | 43.75 [25.00, 68.75] |         | 50.00 [25.00, 75.00]                                             | 31.25 [18.75, 50.00] |          | <0.001         |
|                                        | Interpersonal Disengagement | 20.42 [0.00, 37.50]  |         | 25.00 [0.00, 41.67]                                              | 8.33 [0.00, 25.00]   |          | <0.001         |
| <b><u>Burnout</u></b>                  |                             |                      |         |                                                                  |                      |          |                |
|                                        | ≤ 1.33                      | 219 (54.2%)          |         | 130 (46.8%)                                                      | 89 (70.6%)           |          | <0.001         |
|                                        | > 1.33                      | 185 (45.8%)          |         | 148 (53.2%)                                                      | 37 (29.4%)           |          |                |
| <b><u>Professional Fulfillment</u></b> |                             |                      |         |                                                                  |                      |          |                |
|                                        | ≤ 3.00                      | 327 (81.1%)          |         | 231 (83.1%)                                                      | 96 (76.8%)           |          | 0.168          |
|                                        | > 3.00                      | 76 (18.9%)           |         | 47 (16.9%)                                                       | 29 (23.2%)           |          |                |

Table 3: Severity categories and scores of Depression, Anxiety, Insomnia, Distress, Burnout, and Professional Fulfillment Measurements in Total Cohort and Categorized Between Direct COVID Care.

|                       |      |              |        |                                       |      |              |        |
|-----------------------|------|--------------|--------|---------------------------------------|------|--------------|--------|
| Female                | 1.95 | (1.12, 3.42) | 0.019  | Female                                | 2.18 | (1.32, 3.60) | 0.002  |
| <i>Health Care</i>    |      |              |        | <i>Health Care</i>                    |      |              |        |
| Nurse                 | 1    | [Reference]  | N/A    | Nurse                                 | 1    | [Reference]  | N/A    |
| Doctor                | 2.24 | (1.27, 3.94) | 0.005  | Doctor                                | 1.09 | (0.67, 1.76) | 0.738  |
| <i>COVID Care</i>     |      |              |        | <i>COVID Care</i>                     |      |              |        |
| Second-line           | 1    | [Reference]  | N/A    | Second-line                           | 1    | [Reference]  | N/A    |
| Frontline             | 3.55 | (1.77, 7.11) | <0.001 | Frontline                             | 1.89 | (1.10, 3.17) | 0.021  |
| <b>GAD-7: Anxiety</b> |      |              |        | <b>SPFI: Burnout</b>                  |      |              |        |
| <i>Gender</i>         |      |              |        | <i>Gender</i>                         |      |              |        |
| Male                  | 1    | [Reference]  | N/A    | Male                                  | 1    | [Reference]  | N/A    |
| Female                | 1.95 | (1.04, 3.65) | 0.036  | Female                                | 1.73 | (1.11, 2.71) | 0.017  |
| <i>Health Care</i>    |      |              |        | <i>Health Care</i>                    |      |              |        |
| Nurse                 | 1    | [Reference]  | N/A    | Nurse                                 | 1    | [Reference]  | N/A    |
| Doctor                | 2.29 | (1.21, 4.32) | 0.011  | Doctor                                | 0.86 | (0.55, 1.34) | 0.858  |
| <i>COVID Care</i>     |      |              |        | <i>COVID Care</i>                     |      |              |        |
| Second-line           | 1    | [Reference]  | N/A    | Second-line                           | 1    | [Reference]  | N/A    |
| Frontline             | 2.51 | (1.20, 5.25) | 0.014  | Frontline                             | 2.74 | (1.69, 4.42) | <0.001 |
| <b>ISI: Insomnia</b>  |      |              |        | <b>SPFI: Professional Fulfillment</b> |      |              |        |
| <i>Gender</i>         |      |              |        | <i>Gender</i>                         |      |              |        |
| Male                  | 1    | [Reference]  | N/A    | Male                                  | 1    | [Reference]  | N/A    |
| Female                | 1.77 | (0.85, 3.70) | 0.127  | Female                                | 0.72 | (0.42, 1.24) | 0.234  |
| <i>Health Care</i>    |      |              |        | <i>Health Care</i>                    |      |              |        |
| Nurse                 | 1    | [Reference]  | N/A    | Nurse                                 | 1    | [Reference]  | N/A    |
| Doctor                | 3.08 | (1.38, 6.89) | 0.006  | Doctor                                | 0.90 | (0.52, 1.57) | 0.900  |
| <i>COVID Care</i>     |      |              |        | <i>COVID Care</i>                     |      |              |        |
| Second-line           | 1    | [Reference]  | N/A    | Second-line                           | 1    | [Reference]  | N/A    |
| Frontline             | 4.45 | (1.51, 13.1) | 0.007  | Frontline                             | 0.78 | (0.45, 1.37) | 0.788  |

Table 4: Multivariate logistic regression analysis. Adj OR: adjusted odds ratio, CI: confidence interval.  
<sup>a</sup>Adjusted for age, gender, marital status, working title and COVID care where appropriate.

---

**Hospital**

| <i>Private (n = 365)</i> | <i>Public (n = 68)</i> | <i>P Value</i> |
|--------------------------|------------------------|----------------|
|--------------------------|------------------------|----------------|

---

|    |                                        |              |                  |                 |       |
|----|----------------------------------------|--------------|------------------|-----------------|-------|
| 1  |                                        |              |                  |                 |       |
| 2  |                                        |              |                  |                 |       |
| 3  |                                        |              |                  |                 |       |
| 4  | <b><u>Depression</u></b>               | -            | <b>(n = 357)</b> | <b>(n = 68)</b> |       |
| 5  | <b><u>PHQ-9</u></b>                    | None         | 176 (49.3%)      | 21 (30.9%)      |       |
| 6  |                                        | Mild         | 114 (31.9%)      | 25 (36.8%)      | 0.014 |
| 7  |                                        | Moderate     | 39 (10.9%)       | 11 (16.2%)      |       |
| 8  |                                        | Severe       | 28 (7.8%)        | 11 (16.2%)      |       |
| 9  |                                        |              |                  |                 |       |
| 10 | <b><u>Anxiety</u></b>                  | -            | <b>(n = 351)</b> | <b>(n = 67)</b> |       |
| 11 | <b><u>GAD-7</u></b>                    | Minimal      | 183 (52.1%)      | 25 (37.3%)      |       |
| 12 |                                        | Mild         | 125 (35.6%)      | 23 (34.3%)      | 0.008 |
| 13 |                                        | Moderate     | 23 (6.6%)        | 10 (14.9%)      |       |
| 14 |                                        | Severe       | 20 (5.7%)        | 9 (13.4%)       |       |
| 15 |                                        |              |                  |                 |       |
| 16 | <b><u>Insomnia</u></b>                 | -            | <b>(n = 351)</b> | <b>(n = 67)</b> |       |
| 17 | <b><u>ISI</u></b>                      | None         | 216 (61.5%)      | 30 (44.8%)      |       |
| 18 |                                        | Subthreshold | 105 (29.9%)      | 22 (32.8%)      | 0.004 |
| 19 |                                        | Moderate     | 25 (7.1%)        | 14 (20.9%)      |       |
| 20 |                                        | Severe       | 5 (1.4%)         | 1 (1.5%)        |       |
| 21 |                                        |              |                  |                 |       |
| 22 | <b><u>Distress</u></b>                 | -            | <b>(n = 347)</b> | <b>(n = 63)</b> |       |
| 23 | <b><u>IESR</u></b>                     | Normal       | 246 (70.9%)      | 37 (58.7%)      |       |
| 24 |                                        | Mild         | 39 (11.2%)       | 5 (7.9%)        | 0.014 |
| 25 |                                        | Moderate     | 15 (4.3%)        | 9 (14.3%)       |       |
| 26 |                                        | Severe       | 47 (13.5%)       | 12 (19.0%)      |       |
| 27 |                                        |              |                  |                 |       |
| 28 | <b><u>SPFI</u></b>                     | -            | <b>(n = 343)</b> | <b>(n = 61)</b> |       |
| 29 | <b><u>Burnout</u></b>                  | -            |                  |                 |       |
| 30 |                                        | ≤ 1.33       | 190 (55.4%)      | 29 (47.5%)      | 0.268 |
| 31 |                                        | > 1.33       | 153 (44.6%)      | 32 (52.5%)      |       |
| 32 |                                        |              |                  |                 |       |
| 33 | <b><u>Professional Fulfillment</u></b> |              |                  |                 |       |
| 34 |                                        | ≤ 3.00       | 275 (80.4%)      | 52 (85.2%)      | 0.478 |
| 35 |                                        | > 3.00       | 67 (19.6%)       | 9 (14.8%)       |       |
| 36 |                                        |              |                  |                 |       |

Table 5: Severity categories of Depression, Anxiety, Insomnia, Distress, Burnout, and Professional Fulfillment Measurements in Total Cohort and Categorized Between Private and Public Hospital.



STROBE Statement—Checklist of items that should be included in reports of *cross-sectional studies*

|                              | Item No | Recommendation                                                                                                                                                                                    | Page No |
|------------------------------|---------|---------------------------------------------------------------------------------------------------------------------------------------------------------------------------------------------------|---------|
| <b>Title and abstract</b>    | 1       | (a) Indicate the study's design with a commonly used term in the title or the abstract                                                                                                            | 3       |
|                              |         | (b) Provide in the abstract an informative and balanced summary of what was done and what was found                                                                                               | 3-4     |
| <b>Introduction</b>          |         |                                                                                                                                                                                                   |         |
| Background/rationale         | 2       | Explain the scientific background and rationale for the investigation being reported                                                                                                              | 5-6     |
| Objectives                   | 3       | State specific objectives, including any prespecified hypotheses                                                                                                                                  | 6-7     |
| <b>Methods</b>               |         |                                                                                                                                                                                                   |         |
| Study design                 | 4       | Present key elements of study design early in the paper                                                                                                                                           | 7       |
| Setting                      | 5       | Describe the setting, locations, and relevant dates, including periods of recruitment, exposure, follow-up, and data collection                                                                   | 7       |
| Participants                 | 6       | (a) Give the eligibility criteria, and the sources and methods of selection of participants                                                                                                       | 7-8     |
| Variables                    | 7       | Clearly define all outcomes, exposures, predictors, potential confounders, and effect modifiers. Give diagnostic criteria, if applicable                                                          | 8-9     |
| Data sources/<br>measurement | 8*      | For each variable of interest, give sources of data and details of methods of assessment (measurement). Describe comparability of assessment methods if there is more than one group              | 8-9     |
| Bias                         | 9       | Describe any efforts to address potential sources of bias                                                                                                                                         | 14      |
| Study size                   | 10      | Explain how the study size was arrived at                                                                                                                                                         | 7       |
| Quantitative variables       | 11      | Explain how quantitative variables were handled in the analyses. If applicable, describe which groupings were chosen and why                                                                      | 9       |
| Statistical methods          | 12      | (a) Describe all statistical methods, including those used to control for confounding                                                                                                             | 9       |
|                              |         | (b) Describe any methods used to examine subgroups and interactions                                                                                                                               | 9       |
|                              |         | (c) Explain how missing data were addressed                                                                                                                                                       | 9       |
|                              |         | (d) If applicable, describe analytical methods taking account of sampling strategy                                                                                                                | 9       |
|                              |         | (e) Describe any sensitivity analyses                                                                                                                                                             | -       |
| <b>Results</b>               |         |                                                                                                                                                                                                   |         |
| Participants                 | 13*     | (a) Report numbers of individuals at each stage of study—eg numbers potentially eligible, examined for eligibility, confirmed eligible, included in the study, completing follow-up, and analysed | 9       |
|                              |         | (b) Give reasons for non-participation at each stage                                                                                                                                              | -       |
|                              |         | (c) Consider use of a flow diagram                                                                                                                                                                | -       |
| Descriptive data             | 14*     | (a) Give characteristics of study participants (eg demographic, clinical, social) and information on exposures and potential confounders                                                          | 10      |
|                              |         | (b) Indicate number of participants with missing data for each variable of interest                                                                                                               | 10      |
| Outcome data                 | 15*     | Report numbers of outcome events or summary measures                                                                                                                                              | 10      |

1  
2  
3  
4  
5  
6  
7  
8  
9  
10  
11  
12  
13  
14  
15  
16  
17  
18  
19  
20  
21  
22  
23  
24  
25  
26  
27  
28  
29  
30  
31  
32  
33  
34  
35  
36  
37  
38  
39  
40  
41  
42  
43  
44  
45  
46  
47  
48  
49  
50  
51  
52  
53  
54  
55  
56  
57  
58  
59  
60

|                          |    |                                                                                                                                                                                                              |                 |
|--------------------------|----|--------------------------------------------------------------------------------------------------------------------------------------------------------------------------------------------------------------|-----------------|
| Main results             | 16 | (a) Give unadjusted estimates and, if applicable, confounder-adjusted estimates and their precision (eg, 95% confidence interval). Make clear which confounders were adjusted for and why they were included | 9-11/<br>Tables |
|                          |    | (b) Report category boundaries when continuous variables were categorized                                                                                                                                    | 9-11/<br>Tables |
|                          |    | (c) If relevant, consider translating estimates of relative risk into absolute risk for a meaningful time period                                                                                             | -               |
| Other analyses           | 17 | Report other analyses done—eg analyses of subgroups and interactions, and sensitivity analyses                                                                                                               | -               |
| <b>Discussion</b>        |    |                                                                                                                                                                                                              |                 |
| Key results              | 18 | Summarise key results with reference to study objectives                                                                                                                                                     | 11 – 14         |
| Limitations              | 19 | Discuss limitations of the study, taking into account sources of potential bias or imprecision. Discuss both direction and magnitude of any potential bias                                                   | 14 – 15         |
| Interpretation           | 20 | Give a cautious overall interpretation of results considering objectives, limitations, multiplicity of analyses, results from similar studies, and other relevant evidence                                   | 11-15           |
| Generalisability         | 21 | Discuss the generalisability (external validity) of the study results                                                                                                                                        | 11-15           |
| <b>Other information</b> |    |                                                                                                                                                                                                              |                 |
| Funding                  | 22 | Give the source of funding and the role of the funders for the present study and, if applicable, for the original study on which the present article is based                                                | N/A             |

\*Give information separately for exposed and unexposed groups.

**Note:** An Explanation and Elaboration article discusses each checklist item and gives methodological background and published examples of transparent reporting. The STROBE checklist is best used in conjunction with this article (freely available on the Web sites of PLoS Medicine at <http://www.plosmedicine.org/>, Annals of Internal Medicine at <http://www.annals.org/>, and Epidemiology at <http://www.epidem.com/>). Information on the STROBE Initiative is available at [www.strobe-statement.org](http://www.strobe-statement.org).

# BMJ Open

## MENTAL HEALTH DISORDERS AMONG HEALTH CARE WORKERS DURING THE COVID-19 PANDEMIC: A CROSS-SECTIONAL SURVEY FROM THREE MAJOR HOSPITALS IN KENYA.

|                                 |                                                                                                                                                                                                                                                                                                                                                                                                                                                                                                                                                          |
|---------------------------------|----------------------------------------------------------------------------------------------------------------------------------------------------------------------------------------------------------------------------------------------------------------------------------------------------------------------------------------------------------------------------------------------------------------------------------------------------------------------------------------------------------------------------------------------------------|
| Journal:                        | <i>BMJ Open</i>                                                                                                                                                                                                                                                                                                                                                                                                                                                                                                                                          |
| Manuscript ID                   | bmjopen-2021-050316.R2                                                                                                                                                                                                                                                                                                                                                                                                                                                                                                                                   |
| Article Type:                   | Original research                                                                                                                                                                                                                                                                                                                                                                                                                                                                                                                                        |
| Date Submitted by the Author:   | 12-May-2021                                                                                                                                                                                                                                                                                                                                                                                                                                                                                                                                              |
| Complete List of Authors:       | Shah, Jasmit; The Aga Khan University Hospital Nairobi<br>Monroe-Wise, Aliza; University of Washington Seattle Campus<br>Talib, Zohray ; California University of Science and Medicine<br>Nabiswa, Alphonse; The Aga Khan University Hospital Nairobi<br>Said, Mohammed; Avenue Hospital<br>Abeid, Abdulaziz; Coast General Teaching and Referral Hospital<br>Ali Mohamed, Mohamed; Coast General Teaching and Referral Hospital<br>Mohamed, Sood; Coast General Teaching and Referral Hospital<br>Ali, Sayed; The Aga Khan University Hospital Nairobi, |
| <b>Primary Subject Heading</b>: | Mental health                                                                                                                                                                                                                                                                                                                                                                                                                                                                                                                                            |
| Secondary Subject Heading:      | Global health, Infectious diseases                                                                                                                                                                                                                                                                                                                                                                                                                                                                                                                       |
| Keywords:                       | COVID-19, Public health < INFECTIOUS DISEASES, MENTAL HEALTH, Depression & mood disorders < PSYCHIATRY                                                                                                                                                                                                                                                                                                                                                                                                                                                   |
|                                 |                                                                                                                                                                                                                                                                                                                                                                                                                                                                                                                                                          |

SCHOLARONE™  
Manuscripts



I, the Submitting Author has the right to grant and does grant on behalf of all authors of the Work (as defined in the below author licence), an exclusive licence and/or a non-exclusive licence for contributions from authors who are: i) UK Crown employees; ii) where BMJ has agreed a CC-BY licence shall apply, and/or iii) in accordance with the terms applicable for US Federal Government officers or employees acting as part of their official duties; on a worldwide, perpetual, irrevocable, royalty-free basis to BMJ Publishing Group Ltd ("BMJ") its licensees and where the relevant Journal is co-owned by BMJ to the co-owners of the Journal, to publish the Work in this journal and any other BMJ products and to exploit all rights, as set out in our [licence](#).

The Submitting Author accepts and understands that any supply made under these terms is made by BMJ to the Submitting Author unless you are acting as an employee on behalf of your employer or a postgraduate student of an affiliated institution which is paying any applicable article publishing charge ("APC") for Open Access articles. Where the Submitting Author wishes to make the Work available on an Open Access basis (and intends to pay the relevant APC), the terms of reuse of such Open Access shall be governed by a Creative Commons licence – details of these licences and which [Creative Commons](#) licence will apply to this Work are set out in our licence referred to above.

Other than as permitted in any relevant BMJ Author's Self Archiving Policies, I confirm this Work has not been accepted for publication elsewhere, is not being considered for publication elsewhere and does not duplicate material already published. I confirm all authors consent to publication of this Work and authorise the granting of this licence.

1  
2  
3 **MENTAL HEALTH DISORDERS AMONG HEALTH CARE WORKERS**  
4 **DURING THE COVID-19 PANDEMIC: A CROSS-SECTIONAL SURVEY**  
5 **FROM THREE MAJOR HOSPITALS IN KENYA.**  
6  
7  
8  
9

10 *Jasmit Shah, Aliza Monroe-Wise, Zohray Talib, Alphonse Nabiswa, Mohammed*  
11 *Said, Abdulaziz Abeid, Mohamed Ali Mohamed, Sood Mohamed, Sayed K Ali*  
12  
13  
14  
15  
16  
17  
18  
19  
20  
21  
22  
23  
24  
25  
26  
27  
28  
29  
30  
31  
32  
33  
34  
35  
36  
37  
38  
39  
40  
41  
42  
43  
44  
45  
46  
47  
48  
49  
50  
51  
52  
53  
54  
55  
56  
57  
58  
59  
60

1  
2  
3 Jasmit Shah, PhD  
4 Department of Medicine,  
5 Aga Khan University,  
6 3<sup>rd</sup> Parklands Avenue, Nairobi, Kenya  
7  
8

9 Aliza Monroe-Wise, MD  
10 Department of Global Health,  
11 University of Washington  
12 Seattle, WA 98195, USA  
13

14 Zohray Talib, MD  
15 Department of Medical Education,  
16 California University of Science and Medicine  
17 Colton, CA 92324, USA  
18  
19

20 Alphonse Nabiswa, MBChB  
21 Department of Medicine,  
22 Aga Khan University,  
23 3<sup>rd</sup> Parklands Avenue, Nairobi, Kenya  
24  
25

26 Mohammed Said, MMed  
27 Avenue Hospital,  
28 1<sup>st</sup> Parklands Avenue, Nairobi, Kenya  
29

30 Abdulaziz Abeid, MMed  
31 Department of Medicine  
32 Coast General Teaching and Referral Hospital,  
33 Kisauni Road, Mombasa, Kenya  
34  
35

36 Mohamed Ali Mohamed, MBChB  
37 Department of Medicine  
38 Coast General Teaching and Referral Hospital,  
39 Kisauni Road, Mombasa, Kenya  
40  
41

42 Sood Mohamed, MMed  
43 Coast General Teaching and Referral Hospital,  
44 Kisauni Road, Mombasa, Kenya  
45

46 Corresponding Author:

47 Sayed K Ali, MD  
48 Department of Medicine,  
49 Aga Khan University,  
50 3<sup>rd</sup> Parklands Avenue, Nairobi, Kenya  
51

52 Sayed.karar@aku.edu  
53  
54  
55  
56  
57  
58  
59  
60

## ABSTRACT

### Background:

COVID-19 is an international global health emergency and has posed a great challenge to mental well-being and resilience. Little is known about the mental health impact of COVID-19 among healthcare workers (HCWs) in sub-Saharan Africa or other low-resource settings.

### Methods:

We conducted a cross-sectional study between August and November 2020 among HCWs recruited from three major hospitals in Kenya. The survey questionnaire consisted of six components: demographic and work title characteristics; information regarding care of COVID-19 patients; and symptoms of depression, anxiety, insomnia, distress and burnout, measured using standardized questionnaires. Multivariable logistic regression analysis was performed to identify factors associated with mental health disorders.

### Results:

A total 433 (65.2% response rate) individuals participated in the survey. Median age was 32.75 years, 58.4% were females and 68.8% were frontline workers. Depression, anxiety, insomnia, distress, and burnout were reported in 53.6%, 44.3%, 41.1%, 31.0%, and 45.8% of all participants respectively. Frontline HCWs, females, and doctors were at higher risk of mental health symptoms. Nearly half of participants reported inadequate resources or training to care for COVID-19 patients, and those in the government hospital were more likely to report mental health symptoms.

### Conclusions:

1  
2  
3 This among the first studies examining mental health outcomes among health care workers during  
4 the COVID-19 pandemic in Kenya. Similar to other studies from around the world, HCWs directly  
5 involved with COVID-19 patients reported higher rates of mental health symptoms. Mitigating  
6 strategies specific to Kenyan HCWs are urgently needed to help them cope with mental health  
7 symptoms during the pandemic.  
8  
9  
10  
11  
12  
13  
14  
15  
16  
17

### 18 **Strengths and Limitations**

- 19
- 20
- 21 • To the best of our knowledge, this is one of the first articles reporting the prevalence of
- 22 mental health disorders among HCWs during the COVID-19 pandemic in Kenya.
- 23
- 24
- 25 • Mental health disorders were measured using specific standardized questionnaires.
- 26
- 27
- 28 • The study was conducted between the first and second waves of the virus outbreak and
- 29 the results might not be suggestive of the long-term psychological disorders within our
- 30 HCW population.
- 31
- 32
- 33
- 34
- 35 • There is need for cost-effective mitigating strategies to help curb the burden of mental
- 36 health disorders associated with caring for COVID-19 patients in Kenya.
- 37
- 38
- 39
- 40
- 41
- 42
- 43
- 44
- 45
- 46
- 47
- 48
- 49
- 50
- 51
- 52
- 53
- 54
- 55
- 56
- 57
- 58
- 59
- 60



## BACKGROUND

The immense toll of the global SARS CoV-2 pandemic continues to rise, with over 87 million confirmed cases and almost 1.9 million deaths to date <sup>1</sup>. COVID-19 reached Kenya in March 2020, and as of December 2020, there were over 97,000 confirmed cases and 1,700 deaths <sup>1</sup>. COVID-19 has had a significant impact on the healthcare workforce. Increased work-load, long hours, inadequate personal protective equipment (PPE), the need to make ethically and morally difficult decisions, a lack of social support, isolation from and fear of infecting family members and oneself can have major impacts on the mental health of frontline workers <sup>2</sup>. Multiple recent studies conducted in Turkey, Singapore, India, Italy, Spain, China, the United States and Oman have shown high rates of stress, depression, anxiety and burnout among healthcare workers (HCW) taking care of COVID-19 patients <sup>3-9</sup>. Other studies have shown higher rates of mental health disorders among HCWs caring for COVID-19 compared with those not caring for COVID-19 patients <sup>10-15</sup>. Risk factors for mental health symptoms among HCWs caring for COVID-19 patients include being female, young, single, having minimal work experience and working on the frontlines <sup>10</sup>. Unfortunately, the psychological impact of the COVID-19 pandemic has also resulted in HCWs suicides <sup>16</sup>. A global study done between April and May 2020 across 31 countries looking at mental health outcomes in HCWs during the initial stage of the pandemic, showed an overall prevalence of 60% anxiety and 53% depression. There were only 49 responses from eleven countries in Africa, including Kenya <sup>17</sup>. This was the beginning of the COVID-19 in most African countries where the cases were still low (Kenya: April 2020 total was ~400 positive cases) <sup>1</sup>.

Quality healthcare, especially during a pandemic, requires a robust health workforce with adequate numbers, optimal physical and mental well-being and a supportive environment. Many parts of Africa continue to struggle with the rising cases of COVID-19 amidst limited medical resources

1  
2  
3 and infrastructure, inadequate health care workforce and minimal ICU beds. The Organization for  
4 Economic Co-operation and Development (OECD) in 2020 reported 2.6 and 3 physicians and 11.9  
5 and 7.8 nurses per 1,000 people in the United States and United Kingdom respectively. Austria  
6 reported the most physicians (5.2) while Norway reported the most nurses (18) per 1,000 people  
7  
8  
9  
10  
11  
12  
13  
14  
15  
16  
17  
18  
19  
20  
21  
22  
23  
24  
25  
26  
27  
28  
29  
30  
31  
32  
33  
34  
35  
36  
37  
38  
39  
40  
41  
42  
43  
44  
45  
46  
47  
48  
49  
50  
51  
52  
53  
54  
55  
56  
57  
58  
59  
60

<sup>18</sup>. Most recent corresponding figures from the WHO in Kenya were 0.2 physicians and 1.2 nurses per 1,000 people <sup>19</sup>. Additionally, Kenya has approximately 14 hospital beds per 10,000 people with 537 ICU beds and 256 ventilators serving a population of close to 50 million people <sup>19 20</sup>. In contrast, the WHO in 2019 reported 25 hospital beds per 10,000 people in the United Kingdom with a population of approximately 67 million people <sup>19</sup>. Many African countries have fragile health care systems with fewer than 30 critical care beds for their entire population and only a handful of fully trained critical care physicians, highlighting the lack of critical resources to adequately address the COVID-19 pandemic in Africa <sup>2 21</sup>. Mental health resources and providers are also lacking in Kenya. As of 2016, Kenya reported 0.18 psychiatrists and 0.002 psychologists per 10,000 people with less than 1% of the public sector having access to any form of mental health care services <sup>19 22</sup>. Furthermore, similar to other sub-Saharan African (SSA) countries, Kenya has no formal mental health response plan within the larger COVID-19 strategic response <sup>22</sup>.

Historical experiences with deadly pandemics can offer invaluable lessons to resource limited settings. During the Ebola pandemic in Western Africa in the early parts of 2014, the pandemic swiftly crippled an already weak health care system, resulting in approximately 69% of HCWs deaths with anecdotal evidence of increasing mental health disorders among survivors <sup>23-25</sup>. However, few studies have been conducted on the association of the Ebola pandemic on HCWs mental health symptoms. Similarly, a year into the COVID-19 pandemic, little is known on the effect of the pandemic on the mental health of HCWs in SSA or in any resource-limited setting.

1  
2  
3 We therefore aimed to measure the prevalence of mental health symptoms among HCWs in 3  
4 major hospitals in Kenya, and to evaluate risk factors for mental health symptoms among HCWs  
5  
6 in these hospitals.  
7  
8  
9  
10  
11  
12

## 13 **METHODS**

### 14 **Study Design**

15  
16  
17 We carried out a cross sectional study between August and November, 2020.  
18  
19

### 20 **Participants and Study Site**

21  
22 Physicians, including residents and fellows, and nurses were recruited from 1 government (Coast  
23  
24 General Teaching and Referral Hospital, Mombasa (CGTRH)) and 2 private hospitals (Aga Khan  
25  
26 University Hospital, Nairobi (AKUHN), and Avenue Hospital, Nairobi).  
27  
28  
29

### 30 **Recruitment and Enrollment**

31  
32 Email addresses of all physicians and nurses in each hospital were obtained by the principal site  
33  
34 investigator in each hospital with help of the Information Technology Department. Physicians and  
35  
36 nurses were recruited from AKUHN, CGTRH and Avenue Hospital. Email invitations with a link  
37  
38 to a voluntary, de-identified survey were sent to 725 HCWs. Responses from HCW remained  
39  
40 anonymous.  
41  
42  
43

### 44 **Ethical Approval**

45  
46 Approval for this study was obtained from the Institutional Ethics and Review Committee at the  
47  
48 Aga Khan University, Nairobi and the hospital leadership at CGTRH and Avenue Hospital. Online  
49  
50 consent was obtained from all the participants. Participants were allowed to withdraw from the  
51  
52 study at any time without any consequences. The survey was anonymous, and confidentiality of  
53  
54  
55  
56  
57  
58  
59  
60

1  
2  
3 information was assured. On conclusion of the survey, a score for each mental health disorder was  
4  
5 computed and shared with the participants. If the scores indicated a mental health issue, the  
6  
7 participants were directed to seek medical consultation with their primary care provider or the  
8  
9 counselling services at the respective hospitals. If any of the participants indicated suicidal or  
10  
11 homicidal ideations, they were directed to the mental health hotline at the Aga Khan University  
12  
13 Hospital or an assigned physician at the CGTRH and Avenue Hospital.  
14  
15

## 16 17 **Procedures**

18  
19 Online survey data were collected through the Research Electronic Data Capture - REDCap  
20  
21 platform (Vanderbilt and National Institute of Health) <sup>26</sup>. Email reminders were sent out twice a  
22  
23 week from REDCap for participation in the survey. Every participant received a unique link  
24  
25 allowing them to complete the survey only once. The survey questionnaire in English consisted of  
26  
27 six components: demographic characteristics (including job title, experiences providing care to  
28  
29 patients with COVID-19), and sections on symptoms of depression, anxiety, insomnia, distress  
30  
31 and burnout. On average the surveys took about five to seven minutes to complete. Mental health  
32  
33 symptoms were measured using validated questionnaires: the 9-item Patient Health Questionnaire  
34  
35 (PHQ-9) for depression <sup>27</sup>, the 7-item Generalized Anxiety Disorder Questionnaire (GAD-7) for  
36  
37 anxiety <sup>28</sup>, the 7-item Insomnia Severity Index Questionnaire (ISI) for insomnia <sup>29</sup>, the 22-item  
38  
39 Impact of Event Scale–Revised (IES-R) for distress caused by traumatic events <sup>30</sup> and the 16-item  
40  
41 Stanford Professional Fulfillment Index Questionnaire (SPFI) for burnout <sup>31</sup>. While the 22-item  
42  
43 Impact of Event Scale–Revised (IES-R) was initially designed for diagnosing post-traumatic stress  
44  
45 disorder (PTSD), it has been used in multiple recent studies to measure COVID-19-related  
46  
47 psychological distress and we have used it to measure general distress caused by traumatic events  
48  
49  
50  
51  
52  
53  
54 <sup>3 13</sup>. The cutoff score for detecting symptoms of major depression, anxiety, insomnia, and distress  
55  
56  
57  
58  
59  
60

1  
2  
3 were 10, 7, 15, and 26, respectively<sup>13</sup>. The categories of the severity of each mental health disorder  
4 are presented in Table 1. Based on previously published literature, we defined frontline HCWs as  
5 those HCWs who reported in providing direct care (diagnosing, treating or providing nursing care)  
6 as ‘frontline HCWs’ to COVID-19 patients<sup>13 15</sup>. HCWs who were not taking care of COVID-19  
7 patients were mostly from the outpatient clinics as well as the non-COVID wards.  
8  
9

### 14 **Statistical Analysis**

16  
17 Categorical data were analyzed as frequencies and percentages whereas continuous data were  
18 analyzed as medians with interquartile ranges (IQR). The nonparametric Kruskal-Wallis test was  
19 utilized to compare the continuous variables and Fishers exact test was used to compare the  
20 categorical variables between two groups. To determine potential risk factors for symptoms of  
21 depression, anxiety, insomnia, distress, burnout and professional fulfillment in participants, a  
22 multivariate logistic regression analysis was performed, and the associations between risk factors  
23 and outcomes are presented as odds ratios (ORs) and 95% confidence intervals (CIs). The outcome  
24 variables for the multivariate logistic regressions were mental health disorders dichotomized using  
25 the standard cutoffs as above. Data analysis was performed using SPSS statistical software version  
26 20.0 (IBM Corp). The significance level was set at  $\alpha = .05$ , and all tests were 2-tailed.  
27  
28  
29  
30  
31  
32  
33  
34  
35  
36  
37  
38  
39

### 40 **Patient and public involvement**

41  
42 Patients or the public were not involved in the research design, reporting, or survey dissemination  
43 strategies of this study.  
44  
45  
46  
47  
48

## 49 **RESULTS**

50  
51 Of the 725 invited HCWs across the three hospitals, 473 (65.2%) responded to the survey and 433  
52 (91.5%, overall: 59.7%) consented to complete the survey (Table 2). The median age of the  
53 participants was 32.8 years (IQR: 29.7, 36.8). Of the 433 responding participants, 253 (58.4%)  
54  
55  
56  
57  
58  
59  
60

1  
2  
3 were females, and 244 (56.7%) were married. Most of the participants were medical doctors (243  
4 [56.1%]) and of African ethnicity (354 [82.5%]). A total of 298 participants (68.8%) were frontline  
5  
6 HCWs directly engaged in COVID-19 care and treatment. Of the frontline workers, 122 (41.1%)  
7  
8 had cared for about 5-20 patients and 174 (58.8%) had lost a patient to COVID-19. Only 3.7% of  
9  
10 all participants reported a prior history or diagnosis of any mental health disorder.  
11  
12

13  
14 Using the standardized screening tools, depression, anxiety, insomnia, distress, and burnout were  
15  
16 reported in 53.6%, 44.3%, 41.1%, 31.0%, and 45.8% of all participants, respectively. Severe  
17  
18 symptoms of depression, anxiety, insomnia, distress, and burnout were more commonly reported  
19  
20 among frontline HCWs than colleagues who were not frontline HCWs. For example, severe  
21  
22 depression was reported among 11.6% of frontline HCWs (n=34) compared with 3.8% (n=5)  
23  
24 among workers not directly caring for COVID-19 patients ( $p < 0.001$ , Table 3). The questionnaires  
25  
26 demonstrated good internal consistency with a Cronbach alpha of 0.904, 0.912, 0.896, 0.971 and  
27  
28 0.935 for PHQ-9, GAD-7, ISI, IES-R and SPFI respectively.  
29  
30  
31

32  
33 Multivariate logistic regression analysis showed that after adjustment, working on the frontlines  
34  
35 was an independent risk variable for all the mental health disorders (depression, OR 3.55; 95% CI,  
36  
37 1.77-7.11;  $p < 0.001$ ; anxiety, OR 2.51; 95% CI, 1.20-5.25;  $p = 0.014$ ; insomnia, OR 4.45; 95% CI,  
38  
39 1.51-13.10;  $p = 0.007$ ; distress: OR, 1.89, 95% CI, 1.10-3.17;  $p = 0.021$  and burnout: OR, 2.74, 95%  
40  
41 CI, 1.69-4.42;  $p < 0.001$ ). Furthermore, being a doctor and being a female were associated with  
42  
43 severe symptoms of depression and anxiety, with an OR of 1.95 for severe depression among  
44  
45 women compared with men, (95% CI, 1.12-3.42;  $p = 0.019$ ) and an OR of 2.29 for severe anxiety  
46  
47 among doctors compared with nurses (95% CI, 1.21-4.32;  $p = 0.011$ ) (Table 4). Although age was  
48  
49 not statistically associated with dichotomized mental health outcomes in multivariate analysis,  
50  
51 higher age was correlated with lower mental health disorder scores by Pearson's correlation. The  
52  
53  
54  
55  
56  
57  
58  
59  
60

1  
2  
3 correlation for age with depression, anxiety, insomnia, distress and burnout was -0.144, -0.118, -  
4 0.179, -0.144, and -0.239 (all p values <0.001).  
5  
6

7  
8 Nearly half of frontline workers stated that they lacked adequate resources and PPE to care for  
9  
10 COVID-19 patients, and fewer felt that they needed additional training to take care of or treat  
11  
12 COVID-19 patients (resources: 45.8%, trained: 46.0%). On further analysis, we found that HCWs  
13  
14 employed in public institutions were more likely to report having inadequate resources than those  
15  
16 in the private hospital (OR 14.55, 95% CI, 5.99-35.34; p<0.001), and were more likely to report  
17  
18 being inadequately trained (OR 3.61, 95% CI, 1.91-6.81; p<0.001).  
19  
20

21  
22 Furthermore, respondents from the public institution reported experiencing more moderate to  
23  
24 severe symptom levels of depression, anxiety, insomnia, and distress (eg, moderate and severe  
25  
26 depression among private vs public: 67 [18.7%] vs 22 [32.4%]; p=0.014, moderate and severe  
27  
28 anxiety among private vs public: 43 [12.3%] vs 19 [28.3%]; p=0.008; moderate and severe  
29  
30 insomnia among private vs public: 30 [8.5%] vs 15 [22.4%]; p=0.004 and distress among private  
31  
32 vs public: 62 [17.8%] vs 21 [33.3%]; p=0.014) (Table 5).  
33  
34  
35  
36  
37

## 38 **DISCUSSION**

39  
40  
41 To our knowledge, this is among the first studies to investigate mental health disorders among  
42  
43 HCWs during the COVID-19 pandemic in Kenya, or to evaluate the associations between COVID-  
44  
45 19 and mental health symptoms in any resource-limited setting in sub-Saharan Africa. Our study  
46  
47 examined HCWs in one government and two private hospitals in Kenya actively involved in the  
48  
49 care of COVID-19 patients. Two of the institutions were located in Nairobi and one in Mombasa;  
50  
51 both major cities have been greatly affected by COVID-19.  
52  
53  
54  
55  
56  
57  
58  
59  
60

1  
2  
3 Despite only 3.7% reporting ever having mental health disorders previously, our study reported  
4 higher rates of depression, anxiety, insomnia, distress, and burnout. Similar to studies conducted  
5  
6 in other countries, being a frontline worker was associated with higher scores for depression,  
7  
8 anxiety, insomnia, distress and burnout. Our study also showed that being a female and a doctor  
9  
10 was significantly associated with severe symptoms of depression and anxiety. This is in contrast  
11  
12 to other studies in which nurses experienced more psychological symptoms associated with caring  
13  
14 for COVID-19 patients<sup>5 13 32</sup>. This specific finding needs further research to understand if there is  
15  
16 a cultural aspect related to this and whether level of knowledge and education plays a role in the  
17  
18 anxiety level of different HCWs.  
19  
20  
21  
22  
23

24 The median age of our study population was 32.8 years. Age was significantly negatively  
25  
26 correlated with mental health disorders which was similar to findings from other studies<sup>11 15 33</sup>.  
27  
28 We observed higher overall percentages of depression, anxiety, and insomnia among frontline  
29  
30 HCWs taking care of COVID-19 patients than have been found in similar studies conducted in  
31  
32 higher income countries using the same validated scales and diagnostic criteria<sup>3 6 11-15</sup>. While  
33  
34 methods of these studies vary slightly, this finding in our setting could be attributed to the limited  
35  
36 resources and lack of mitigating strategies such as a formal mental health response plan, readily  
37  
38 available mental health services, regulation of work hours and adequate medical resources in  
39  
40 Kenya.  
41  
42  
43  
44  
45

46 A recent study on mental health disorders among trainees at three American academic medical  
47  
48 centers found that trainees taking care of COVID-19 patients had higher rates of burnout compared  
49  
50 to those not taking care of COVID-19 patients, but found no significant difference in professional  
51  
52 fulfillment scores<sup>34</sup>. On the contrary, a study in Turkey showed a lower level of burnout in  
53  
54 physicians taking care of COVID-19 patients compared with physicians who took care of non  
55  
56  
57  
58  
59  
60



1  
2  
3 COVID-19 patients<sup>35</sup>. In our study, we found statistically higher rates of burnout among all cadres  
4 of HCWs at all institutions taking care of COVID-19 patients compared to those not taking care  
5 of COVID-19 patients. We found no statistical difference in professional fulfillment scores.  
6  
7

8  
9  
10 Overall, we found that half of the respondents felt inadequately trained and reported lack of enough  
11 resources and PPE to safely care for COVID-19 patients. A study looking at HCW knowledge,  
12 attitude and practices in Uganda found that 69% reported sufficient knowledge and 74% had a  
13 positive attitude around COVID-19<sup>36</sup>. Similarly, Mbachu and colleagues reported excellent  
14 knowledge and good preventative practices towards COVID-19 in Nigeria<sup>37</sup>.  
15  
16  
17  
18  
19  
20  
21  
22

23 In our study, HCWs at the government hospital felt less trained with inadequate resources and PPE  
24 to take care of COVID-19 patients than those in the private hospitals. Fifty two percent of the  
25 hospitals in Kenya are funded by the government. These public hospitals frequently operate with  
26 inadequate healthcare workforce and basic amenities, with 74 of 2927 primary public hospitals  
27 (2.5%) reporting lacking a medical doctor to serve the local population<sup>38</sup> and only 55% of the  
28 healthcare facilities having basic amenities including sanitation facilities, communication  
29 technologies, consultation rooms, improved water sources, power supplies, emergency rooms and  
30 computers with internet access. Furthermore, only 12% of health facilities in Kenya report having  
31 items necessary for infection prevention<sup>38</sup>. Even though the private sector owns and manages  
32 almost two-thirds of all Kenya's healthcare facilities, basic data on healthcare resources is lacking  
33  
34  
35  
36  
37  
38  
39  
40  
41  
42  
43  
44  
45  
46  
47  
48  
49  
50  
51  
52  
53  
54  
55  
56  
57  
58  
59  
60

39 40. A report from USAID Kenya Private Health Sector Assessment highlight the inequalities of  
health care resources in Kenya with three-quarters of doctors and approximately two-thirds of  
nurses and clinical officers employed by the private sector<sup>39</sup>. In addition, compared to the public  
sector, the private sector offers better remuneration, minimizing healthcare worker strikes and  
improving the overall work environment<sup>40</sup>. COVID-19 has significantly contributed to many

1  
2  
3 unresolved logistical issues in public hospitals, including waste management, infrastructure and  
4 funding, affecting the morale and welfare of healthcare workers <sup>41</sup>. Other recent studies have  
5 shown that challenges in acquisition of PPE in public hospitals is associated with higher levels of  
6 anxiety for both clinical and support staff <sup>41</sup>. Mbachu and colleagues showed that a lack of PPE  
7 had a negative impact on the attitudes of HCWs in Nigeria <sup>37</sup>. Likewise, in our study, HCWs in  
8 the government institution also showed significantly higher rates of depression, anxiety, insomnia  
9 and distress than those in the private hospitals. We could find no other study comparing mental  
10 health outcomes between private and government hospital in our or any other settings. In addition  
11 to the absence of mitigating strategies unique to HCWs taking care of COVID-19 patients, our  
12 findings also stress the importance of adequate medical personnel, training, critical care beds and  
13 other key resources to help fortify fragile health care systems within many African countries and  
14 to better tackle the COVID-19 pandemic.  
15  
16  
17  
18  
19  
20  
21  
22  
23  
24  
25  
26  
27  
28  
29  
30

31 Like many other countries in SSA, Kenya lacks a formal mental health response plan to the  
32 COVID-19 pandemic <sup>22</sup>. Some researcher in Kenya has called for key recommendations to help  
33 strengthen the mental health response to COVID-19 including a dynamic mental health response  
34 plan designed by mental health experts specific to the needs of the country and grassroots training  
35 of community health workers and volunteers, especially HIV counsellors and retired nurses,  
36 remains key not only to target the population at large but also to focus on providing key mental  
37 health services to HCWs in institutions across the country <sup>22</sup>. Like many other African countries,  
38 regular press releases on television and radios are used to disseminate key information on COVID-  
39 19 in Kenya <sup>42</sup>. These platforms can be used to educate the population on COVID-19 but also to  
40 demystify the stigma around seeking mental health services related to COVID-19. Of note, Kenya  
41 has a 91% penetration of mobile subscriptions allowing the use of mobile health applications to  
42  
43  
44  
45  
46  
47  
48  
49  
50  
51  
52  
53  
54  
55  
56  
57  
58  
59  
60

1  
2  
3 further enhance the delivery of care not only to the local population, but also health care workers  
4  
5  
6 <sup>22</sup>. In addition, toll-free mental health helplines could be a key step to improving access to mental  
7  
8 health services especially for specific populations such as HCWs providing care to COVID-19  
9  
10 patients <sup>42</sup>. Senior leadership at every hospital, with the support of the government and donor  
11  
12 organizations, should seek creative ways to enhance the mental health capabilities and resources  
13  
14 especially for HCWs taking care of COVID-19 patients. This includes either investing in training  
15  
16 and capacity building opportunities or sharing resources among various hospitals geographically  
17  
18 and electronically to better support the response process. Providing daily allowances to frontline  
19  
20 HCWs, additional tax relief, as well as publicly acknowledging their heroic efforts might be ways  
21  
22 to boost morale and improve mental health outcomes in limited resource settings <sup>2</sup>.  
23  
24  
25

26  
27 Our study has several limitations. It was conducted in one government hospital in Mombasa and  
28  
29 two private hospitals in Nairobi, with different funding structures. This was a cross-sectional  
30  
31 survey and the responses were not equally distributed among the HCW cadres, which could bias  
32  
33 the results. This may have occurred due to higher email utilization among doctors than among  
34  
35 nurses. Also being a cross-sectional survey, the study could only describe the prevalence of mental  
36  
37 health symptoms. Our study was conducted between the first and second waves of the virus  
38  
39 outbreak and our results might not be suggestive of the long-term psychological disorders within  
40  
41 our HCW population. We also did not ask the participants if they had contracted COVID-19  
42  
43 themselves or if they had unprotected exposure to COVID-19. Electronic mail with frequent  
44  
45 reminders was only used, which could have potentially limited our response rate. Lastly, there may  
46  
47 have been a response bias in that the non-responders may have been suffering from mental health  
48  
49 symptoms, limiting the motivation to respond.  
50  
51  
52  
53

## 54 55 **CONCLUSION**

Our study, the first conducted in Kenya and one of the first in a low-resource healthcare setting, shows markedly higher rates of mental health disorders including depression and anxiety in all health care workers taking care of COVID-19 patients than those not caring for COVID-19 patients, and higher rates than those reported in higher-income countries. Being a doctor and a female were associated with severe symptoms of depression and anxiety. Furthermore, HCWs in the government institution experienced higher rates of mental health symptoms than their counterparts in private institutions. This study highlights the urgent need for cost-effective, easy to replicate and rapid to implement mitigating strategies to help curb the burden of mental health disorders associated with caring for COVID-19 patients in Kenya and other resource-limited countries. Special attention should be paid to HCWs in the government hospitals.

## REFERENCES

1. World Health Organization. WHO Coronavirus Disease (COVID-19) Dashboard [Available from: <https://covid19.who.int/> accessed 9 Jan 2021].
2. Chersich MF, Gray G, Fairlie L, et al. COVID-19 in Africa: care and protection for frontline healthcare workers. *Global Health* 2020;16(1):46. doi: 10.1186/s12992-020-00574-3 [published Online First: 2020/05/18]
3. Chew NWS, Lee GKH, Tan BYQ, et al. A multinational, multicentre study on the psychological outcomes and associated physical symptoms amongst healthcare workers during COVID-19 outbreak. *Brain Behav Immun* 2020;88:559-65. doi: 10.1016/j.bbi.2020.04.049 [published Online First: 2020/04/25]
4. Shechter A, Diaz F, Moise N, et al. Psychological distress, coping behaviors, and preferences for support among New York healthcare workers during the COVID-19 pandemic. *Gen Hosp Psychiatry* 2020;66:1-8. doi: 10.1016/j.genhosppsy.2020.06.007 [published Online First: 2020/06/27]
5. Pappa S, Ntella V, Giannakas T, et al. Prevalence of depression, anxiety, and insomnia among healthcare workers during the COVID-19 pandemic: A systematic review and meta-analysis. *Brain Behav Immun* 2020;88:901-07. doi: 10.1016/j.bbi.2020.05.026 [published Online First: 2020/05/22]
6. Bohlken J, Schömig F, Lemke MR, et al. [COVID-19 Pandemic: Stress Experience of Healthcare Workers - A Short Current Review]. *Psychiatr Prax* 2020;47(4):190-97. doi: 10.1055/a-1159-5551 [published Online First: 2020/04/28]
7. Martínez-López J, Lázaro-Pérez C, Gómez-Galán J, et al. Psychological Impact of COVID-19 Emergency on Health Professionals: Burnout Incidence at the Most Critical Period in Spain. *J Clin Med* 2020;9(9) doi: 10.3390/jcm9093029 [published Online First: 2020/09/24]

- 1
  - 2
  - 3
  - 4
  - 5
  - 6
  - 7
  - 8
  - 9
  - 10
  - 11
  - 12
  - 13
  - 14
  - 15
  - 16
  - 17
  - 18
  - 19
  - 20
  - 21
  - 22
  - 23
  - 24
  - 25
  - 26
  - 27
  - 28
  - 29
  - 30
  - 31
  - 32
  - 33
  - 34
  - 35
  - 36
  - 37
  - 38
  - 39
  - 40
  - 41
  - 42
  - 43
  - 44
  - 45
  - 46
  - 47
  - 48
  - 49
  - 50
  - 51
  - 52
  - 53
  - 54
  - 55
  - 56
  - 57
  - 58
  - 59
  - 60
8. Liu X, Chen J, Wang D, et al. COVID-19 Outbreak Can Change the Job Burnout in Health Care Professionals. *Front Psychiatry* 2020;11:563781. doi: 10.3389/fpsy.2020.563781 [published Online First: 2020/12/29]
9. Khasne RW, Dhakulkar BS, Mahajan HC, et al. Burnout among Healthcare Workers during COVID-19 Pandemic in India: Results of a Questionnaire-based Survey. *Indian J Crit Care Med* 2020;24(8):664-71. doi: 10.5005/jp-journals-10071-23518 [published Online First: 2020/10/08]
10. Elbay RY, Kurtulmuş A, Arpacioğlu S, et al. Depression, anxiety, stress levels of physicians and associated factors in Covid-19 pandemics. *Psychiatry Res* 2020;290:113130. doi: 10.1016/j.psychres.2020.113130 [published Online First: 2020/06/05]
11. Rossi R, Socci V, Pacitti F, et al. Mental Health Outcomes Among Frontline and Second-Line Health Care Workers During the Coronavirus Disease 2019 (COVID-19) Pandemic in Italy. *JAMA Netw Open* 2020;3(5):e2010185. doi: 10.1001/jamanetworkopen.2020.10185 [published Online First: 2020/05/29]
12. Evanoff BA, Strickland JR, Dale AM, et al. Work-Related and Personal Factors Associated With Mental Well-Being During the COVID-19 Response: Survey of Health Care and Other Workers. *J Med Internet Res* 2020;22(8):e21366. doi: 10.2196/21366 [published Online First: 2020/08/09]
13. Lai J, Ma S, Wang Y, et al. Factors Associated With Mental Health Outcomes Among Health Care Workers Exposed to Coronavirus Disease 2019. *JAMA Netw Open* 2020;3(3):e203976. doi: 10.1001/jamanetworkopen.2020.3976 [published Online First: 2020/03/24]
14. Zhang WR, Wang K, Yin L, et al. Mental Health and Psychosocial Problems of Medical Health Workers during the COVID-19 Epidemic in China. *Psychother Psychosom* 2020;89(4):242-50. doi: 10.1159/000507639 [published Online First: 2020/04/10]
15. Badahdah A, Khamis F, Al Mahyijari N, et al. The mental health of health care workers in Oman during the COVID-19 pandemic. *Int J Soc Psychiatry* 2020:20764020939596. doi: 10.1177/0020764020939596 [published Online First: 2020/07/09]
16. Watkins A, Rothfeld M, Rashbaum WK, et al. Top E.R. Doctor Who Treated Virus Patients Dies by Suicide. *New York Times* 2020 27 April 2020.
17. Htay MNN, Marzo RR, AlRifai A, et al. Immediate impact of COVID-19 on mental health and its associated factors among healthcare workers: A global perspective across 31 countries. *J Glob Health* 2020;10(2):020381. doi: 10.7189/jogh.10.020381 [published Online First: 2020/11/21]
18. OECD. OECD Health Indicators, OECD [Available from: <https://data.oecd.org/health.htm> accessed 9 Jan 2021.
19. World Health Organization. The Global Health Observatory [23 Dec]. Available from: <http://www.who.int/hrh/statistics/hwfstats/> accessed 2020.
20. Barasa EW, Ouma PO, Okiro EA. Assessing the hospital surge capacity of the Kenyan health system in the face of the COVID-19 pandemic. *PloS one* 2020;15(7):e0236308-e08. doi: 10.1371/journal.pone.0236308
21. Murthy S, Leligdowicz A, Adhikari NK. Intensive care unit capacity in low-income countries: a systematic review. *PloS one* 2015;10(1):e0116949. doi: 10.1371/journal.pone.0116949 [published Online First: 2015/01/27]
22. Jaguga F, Kwobah E. Mental health response to the COVID-19 pandemic in Kenya: a review. *Int J Ment Health Syst* 2020;14:68. doi: 10.1186/s13033-020-00400-8 [published Online First: 2020/08/22]
23. Kamara S, Walder A, Duncan J, et al. Mental health care during the Ebola virus disease outbreak in Sierra Leone. *Bull World Health Organ* 2017;95(12):842-47. doi: 10.2471/blt.16.190470 [published Online First: 2017/12/05]
24. International Medical Corps. Assessment of Mental Health and Psychosocial Support (MHPSS) Needs and Resources in the Context of Ebola 2014 [Available from:

- 1  
2  
3 <http://ebolacommunicationnetwork.org/wp-content/uploads/2015/01/IMC-Sierra-Leone-Dec-2014-Ebola-MHPSS-Assessment.pdf> accessed 9 Jan 2021.
- 4  
5  
6 25. World Health Organization. Health worker Ebola infections in Guinea, Liberia and Sierra Leone 2015  
7 [Available from: [https://www.who.int/hrh/documents/21may2015\\_web\\_final.pdf](https://www.who.int/hrh/documents/21may2015_web_final.pdf) accessed 9  
8 Jan 2021.
- 9  
10 26. Harris PA, Taylor R, Minor BL, et al. The REDCap consortium: Building an international community of  
11 software platform partners. *J Biomed Inform* 2019;95:103208. doi: 10.1016/j.jbi.2019.103208  
12 [published Online First: 2019/05/13]
- 13  
14 27. Kroenke K, Spitzer RL, Williams JB. The PHQ-9: validity of a brief depression severity measure. *J Gen  
15 Intern Med* 2001;16(9):606-13. doi: 10.1046/j.1525-1497.2001.016009606.x [published Online  
16 First: 2001/09/15]
- 17  
18 28. Spitzer RL, Kroenke K, Williams JB, et al. A brief measure for assessing generalized anxiety disorder:  
19 the GAD-7. *Arch Intern Med* 2006;166(10):1092-7. doi: 10.1001/archinte.166.10.1092 [published  
20 Online First: 2006/05/24]
- 21  
22 29. Morin CM, Belleville G, Bélanger L, et al. The Insomnia Severity Index: psychometric indicators to  
23 detect insomnia cases and evaluate treatment response. *Sleep* 2011;34(5):601-8. doi:  
24 10.1093/sleep/34.5.601 [published Online First: 2011/05/03]
- 25  
26 30. Motlagh H. Impact of Event Scale-revised. *J Physiother* 2010;56(3):203. doi: 10.1016/s1836-  
27 9553(10)70029-1 [published Online First: 2010/08/28]
- 28  
29 31. Trockel M, Bohman B, Lesure E, et al. A Brief Instrument to Assess Both Burnout and Professional  
30 Fulfillment in Physicians: Reliability and Validity, Including Correlation with Self-Reported  
31 Medical Errors, in a Sample of Resident and Practicing Physicians. *Acad Psychiatry*  
32 2018;42(1):11-24. doi: 10.1007/s40596-017-0849-3 [published Online First: 2017/12/03]
- 33  
34 32. Tan BYQ, Chew NWS, Lee GKH, et al. Psychological Impact of the COVID-19 Pandemic on Health Care  
35 Workers in Singapore. *Ann Intern Med* 2020;173(4):317-20. doi: 10.7326/m20-1083 [published  
36 Online First: 2020/04/07]
- 37  
38 33. Youssef N, Mostafa A, Ezzat R, et al. Mental health status of health-care professionals working in  
39 quarantine and non-quarantine Egyptian hospitals during the COVID-19 pandemic. *East Mediterr  
40 Health J* 2020;26(10):1155-64. doi: 10.26719/emhj.20.116 [published Online First: 2020/10/27]
- 41  
42 34. Kannampallil TG, Goss CW, Evanoff BA, et al. Exposure to COVID-19 patients increases physician  
43 trainee stress and burnout. *PLoS one* 2020;15(8):e0237301. doi: 10.1371/journal.pone.0237301  
44 [published Online First: 2020/08/08]
- 45  
46 35. Dinibutun SR. Factors Associated with Burnout Among Physicians: An Evaluation During a Period of  
47 COVID-19 Pandemic. *J Healthc Leadersh* 2020;12:85-94. doi: 10.2147/jhl.S270440 [published  
48 Online First: 2020/09/29]
- 49  
50 36. Olum R, Chekwech G, Wekha G, et al. Coronavirus Disease-2019: Knowledge, Attitude, and Practices  
51 of Health Care Workers at Makerere University Teaching Hospitals, Uganda. *Front Public Health*  
52 2020;8:181. doi: 10.3389/fpubh.2020.00181 [published Online First: 2020/05/20]
- 53  
54 37. Mbachu CNP, Azubuiké CM, Mbachu, II, et al. COVID-19 infection: Knowledge, attitude, practices,  
55 and impact among healthcare workers in a South-Eastern Nigerian state. *J Infect Dev Ctries*  
56 2020;14(9):943-52. doi: 10.3855/jidc.13248 [published Online First: 2020/10/09]
- 57  
58 38. Ministry of Health K. The Kenya Harmonized Health Facility Assessment (KHFA) 2018 [Available from:  
59 <https://www.health.go.ke/wp-content/uploads/2020/01/KHFA-2018-19-Popular-version-report-Final-.pdf>.  
60
39. United States Agency for International Development. Kenya Private Health Sector Assessment 2009  
[Available from:  
<https://www.shopsplusproject.org/sites/default/files/resources/FINAL1%20KPHSA%20Country%20Report.pdf>.

- 1  
2  
3 40. Embassy of the Kingdom of the Netherlands. Kenyan Healthcare Sector: Opportunities for the Dutch  
4 Life Sciences & Health Sector 2016 [Available from: [http://khf.co.ke/wp-](http://khf.co.ke/wp-content/uploads/2018/03/2016-Kenyan-Healthcare-Sector-Report.pdf)  
5 [content/uploads/2018/03/2016-Kenyan-Healthcare-Sector-Report.pdf](http://khf.co.ke/wp-content/uploads/2018/03/2016-Kenyan-Healthcare-Sector-Report.pdf).  
6  
7 41. Maina M, Tosas-Auguet O, English M, et al. Infection prevention and control during the COVID-19  
8 pandemic: challenges and opportunities for Kenyan public hospitals. *Wellcome open research*  
9 2020;5:211. doi: 10.12688/wellcomeopenres.16222.1 [published Online First: 2020/11/19]  
10  
11 42. Semo BW, Frissa SM. The Mental Health Impact of the COVID-19 Pandemic: Implications for Sub-  
12 Saharan Africa. *Psychol Res Behav Manag* 2020;13:713-20. doi: 10.2147/prbm.S264286  
13 [published Online First: 2020/09/29]  
14  
15  
16  
17  
18  
19  
20  
21  
22  
23  
24  
25  
26  
27  
28  
29  
30  
31  
32  
33  
34  
35  
36  
37  
38  
39  
40  
41  
42  
43  
44  
45  
46  
47  
48  
49  
50  
51  
52  
53  
54  
55  
56  
57  
58  
59  
60

## ABBREVIATIONS

|        |                                                        |
|--------|--------------------------------------------------------|
| PPE    | Personal protective equipment                          |
| HCW    | Healthcare worker                                      |
| ICU    | Intensive care unit                                    |
| OECD   | Organization for Economic Co-operation and Development |
| WHO    | World Health Organization                              |
| SSA    | sub-Saharan Africa                                     |
| CGTRH  | Coast General Teaching and Referral Hospital, Mombasa  |
| AKUHN  | Aga Khan University Hospital, Nairobi                  |
| REDCap | Research Electronic Data Capture                       |
| PHQ    | Patient Health Questionnaire                           |
| GAD    | Generalized Anxiety Disorder                           |
| ISI    | Insomnia Severity Index                                |
| IES-R  | Impact of Event Scale–Revised                          |
| SPFI   | Stanford Professional Fulfillment Index                |
| IQR    | Interquartile ranges                                   |
| OR     | Odds Ratio                                             |
| CI     | Confidence Interval                                    |

## FOOTNOTES

**Contributors:** SKA developed the concept study and proposal, supervised the overall project and coordinated the study at AKUHN. AMW, ZT, and AN assisted in the study concept, design and editing of the survey. MS supervised data collection at the Avenue Hospital. AA, MAM and SM supervised the data collection at CGTRH. SKA and JS verified the underlying data. JS did the data analysis. JS and SA wrote the first draft of the paper. All authors reviewed, edited and provided comments on the first and subsequent drafts. All authors reviewed and approved the final manuscript.



1  
2  
3 **Funding:** This research did not receive any specific grant from any funding agencies.  
4  
5

6 **Competing interests:** The authors declare that they have no competing interests.  
7  
8

9  
10 **Patient and public involvement:** Patients and/or the public were not involved in the design, or  
11 conduct, or reporting, or dissemination plans of this research.  
12  
13

14  
15 **Patient consent for publication:** Not required  
16

17  
18 **Ethical approval:** Approval for this study was obtained from the Institutional Ethics and Review  
19 Committee at the Aga Khan University, Nairobi and the hospital leadership at CGTRH and Avenue  
20 Hospital.  
21  
22

23  
24  
25 **Data availability statement:** All participant data used in this research are anonymous. Participant  
26 data used for analysis are available on reasonable request from corresponding author, Sayed K.  
27 Ali at [sayed.karar@aku.edu](mailto:sayed.karar@aku.edu).  
28  
29  
30  
31  
32  
33  
34  
35  
36  
37  
38  
39  
40  
41  
42  
43  
44  
45  
46  
47  
48  
49  
50  
51  
52  
53  
54  
55  
56  
57  
58  
59  
60

---

**Scoring Categories for Mental Health Disorders**


---

**PHQ-9 (Depression)**

Normal (0 – 4)

Mild (5 – 9)

Moderate (10 – 14)

Severe (15 – 27)

*Binary Cut off - 10***IES-R (Distress)**

Normal (0 – 8)

Mild (9 – 25)

Moderate (26 – 43)

Severe (44 – 88)

*Binary Cut off - 26***GAD-7 (Anxiety)**

Normal (0 – 4)

Mild (5 – 9)

Moderate (10 – 14)

Severe (15 – 21)

*Binary Cut off - 7***SPFI (Burnout)**

Yes ( &gt; 1.33 )

No ( ≤ 1.33 )

**SPFI (Professional Fulfillment)**

Yes ( &gt; 3.0 )

No ( ≤ 3.0 )

**ISI (Insomnia)**

Normal (0 – 7)

Subthreshold (8 – 14)

Moderate (15 – 21)

Severe (22 – 28)

*Binary Cut off - 15*


---

 Table 1: Scoring categories for the mental health disorders
 

---

| <b>Characteristics</b>                       | <b>N (%)</b>         |
|----------------------------------------------|----------------------|
| Age (years) (n = 401) (median [IQR])         | 32.75 [29.71, 36.75] |
| Gender                                       |                      |
| Male                                         | 176 (40.6%)          |
| Female                                       | 253 (58.4%)          |
| Prefer not to disclose                       | 4 (1.0%)             |
| Marital Status (n = 430)                     |                      |
| Single                                       | 172 (40.0%)          |
| Married                                      | 244 (56.7%)          |
| Other                                        | 14 (3.3%)            |
| Ethnicity (n = 429)                          |                      |
| African                                      | 354 (82.5%)          |
| Asian                                        | 51 (11.9%)           |
| Other                                        | 24 (5.6%)            |
| Health Care Profession                       |                      |
| Nurses                                       | 190 (43.9%)          |
| Doctors                                      | 243 (56.1%)          |
| Direct care COVID                            |                      |
| Yes                                          | 298 (68.8%)          |
| No                                           | 135 (31.2%)          |
| Patients cared (n = 297)                     |                      |
| < 5 Patients                                 | 101 (34.0%)          |
| 5 - 20 Patients                              | 122 (41.1%)          |
| > 20 Patients                                | 74 (24.9%)           |
| Lost any patients (n = 296)                  |                      |
| Yes                                          | 174 (58.8%)          |
| No                                           | 122 (41.2%)          |
| Enough Resources to care for COVID (n = 297) |                      |
| Yes                                          | 161 (54.2%)          |
| No                                           | 136 (45.8%)          |
| Adequately Trained for COVID (n = 298)       |                      |
| Yes                                          | 161 (54.0%)          |
| No                                           | 137 (46.0%)          |
| History of Mental Health Disorder            |                      |
| Yes                                          | 16 (3.70%)           |
| No                                           | 398 (91.9%)          |
| Not Sure                                     | 15 (3.4%)            |
| Prefer not to disclose                       | 4 (1.0%)             |
| Diagnosis (n = 15)                           |                      |
| Anxiety                                      | 5 (33.3%)            |
| Depression                                   | 7 (46.7%)            |
| Epilepsy                                     | 1 (6.7%)             |

1  
2  
3  
4  
5  
6  
7  
8  
9  
10  
11  
12  
13  
14  
15  
16  
17  
18  
19  
20  
21  
22  
23  
24  
25  
26  
27  
28  
29  
30  
31  
32  
33  
34  
35  
36  
37  
38  
39  
40  
41  
42  
43  
44  
45  
46  
47  
48  
49  
50  
51  
52  
53  
54  
55  
56  
57  
58  
59  
60

|                        |           |
|------------------------|-----------|
| Depression and Anxiety | 2 (13.3%) |
| Still have symptoms    |           |
| Yes                    | 8 (50.0%) |
| No                     | 8 (50.0%) |

---

Table 2: Baseline characteristics of study participants (N = 433)

For peer review only

| Variable                               | Adj OR <sup>a</sup>         | (95% CI)                | P Value | Variable                                                                | Adj OR <sup>a</sup>     | (95% CI) | P Value               |
|----------------------------------------|-----------------------------|-------------------------|---------|-------------------------------------------------------------------------|-------------------------|----------|-----------------------|
| <b><i>PHQ-9: Depression</i></b>        |                             |                         |         | <b><i>IES-R: Distress</i></b>                                           |                         |          |                       |
| <b><i>Total</i></b>                    |                             |                         |         | <b><i>Have you ever directly cared for a patient with COVID-19?</i></b> |                         |          |                       |
|                                        |                             |                         |         | <b><i>Yes</i></b>                                                       | <b><i>No</i></b>        |          | <b><i>P Value</i></b> |
| <b><i>Depression</i></b>               |                             | <b><i>(n = 425)</i></b> |         | <b><i>(n = 292)</i></b>                                                 | <b><i>(n = 133)</i></b> |          |                       |
| <b><i>PHQ-9</i></b>                    | None                        | 197 (46.4%)             |         | 116 (39.7%)                                                             | 81 (60.9%)              |          |                       |
|                                        | Mild                        | 139 (32.7%)             |         | 99 (33.9%)                                                              | 40 (30.1%)              |          | <i>&lt;0.001</i>      |
|                                        | Moderate                    | 50 (11.8%)              |         | 43 (14.7%)                                                              | 7 (5.3%)                |          |                       |
|                                        | Severe                      | 39 (9.2%)               |         | 34 (11.6%)                                                              | 5 (3.8%)                |          |                       |
| <b><i>Anxiety</i></b>                  |                             | <b><i>(n = 418)</i></b> |         | <b><i>(n = 287)</i></b>                                                 | <b><i>(n = 131)</i></b> |          |                       |
| <b><i>GAD-7</i></b>                    | Minimal                     | 208 (49.8%)             |         | 131 (45.6%)                                                             | 77 (58.8%)              |          |                       |
|                                        | Mild                        | 148 (35.4%)             |         | 104 (36.2%)                                                             | 44 (33.6%)              |          | <i>0.017</i>          |
|                                        | Moderate                    | 33 (7.9%)               |         | 27 (9.4%)                                                               | 6 (4.6%)                |          |                       |
|                                        | Severe                      | 29 (6.9%)               |         | 25 (8.7%)                                                               | 4 (3.1%)                |          |                       |
| <b><i>Insomnia</i></b>                 |                             | <b><i>(n = 418)</i></b> |         | <b><i>(n = 287)</i></b>                                                 | <b><i>(n = 131)</i></b> |          |                       |
| <b><i>ISI</i></b>                      | None                        | 246 (58.9%)             |         | 156 (54.4%)                                                             | 90 (68.7%)              |          |                       |
|                                        | Subthreshold                | 127 (30.4%)             |         | 90 (31.4%)                                                              | 37 (28.2%)              |          | <i>0.001</i>          |
|                                        | Moderate                    | 39 (9.3%)               |         | 36 (12.5%)                                                              | 3 (2.3%)                |          |                       |
|                                        | Severe                      | 6 (1.4%)                |         | 5 (1.7%)                                                                | 1 (0.8%)                |          |                       |
| <b><i>Distress</i></b>                 |                             | <b><i>(n = 410)</i></b> |         | <b><i>(n = 281)</i></b>                                                 | <b><i>(n = 129)</i></b> |          |                       |
| <b><i>IESR</i></b>                     | Normal                      | 283 (69.0%)             |         | 185 (65.8%)                                                             | 98 (76.0%)              |          |                       |
|                                        | Mild                        | 44 (10.7%)              |         | 28 (10.0%)                                                              | 16 (12.4%)              |          | <i>0.008</i>          |
|                                        | Moderate                    | 24 (5.9%)               |         | 17 (6.0%)                                                               | 7 (5.4%)                |          |                       |
|                                        | Severe                      | 59 (14.4%)              |         | 51 (18.1%)                                                              | 8 (6.2%)                |          |                       |
| <b><i>Burnout</i></b>                  |                             | <b><i>(n = 404)</i></b> |         | <b><i>(n = 278)</i></b>                                                 | <b><i>(n = 126)</i></b> |          |                       |
|                                        | ≤ 1.33                      | 219 (54.2%)             |         | 130 (46.8%)                                                             | 89 (70.6%)              |          |                       |
|                                        | > 1.33                      | 185 (45.8%)             |         | 148 (53.2%)                                                             | 37 (29.4%)              |          | <i>&lt;0.001</i>      |
| <b><i>Professional Fulfillment</i></b> |                             |                         |         |                                                                         |                         |          |                       |
|                                        | ≤ 3.00                      | 327 (81.1%)             |         | 231 (83.1%)                                                             | 96 (76.8%)              |          |                       |
|                                        | > 3.00                      | 76 (18.9%)              |         | 47 (16.9%)                                                              | 29 (23.2%)              |          | <i>0.168</i>          |
| <b><i>IESR Subscales</i></b>           |                             |                         |         |                                                                         |                         |          |                       |
|                                        | Avoidance Subscale          | 0.80 [0.10, 1.40]       |         | 0.90 [0.10, 1.80]                                                       | 0.60 [0.00, 1.10]       |          | <i>0.032</i>          |
|                                        | Intrusion Subscale          | 0.65 [0.10, 1.30]       |         | 0.80 [0.10, 1.50]                                                       | 0.60 [0.00, 1.10]       |          | <i>0.065</i>          |
|                                        | Hyperarousal Subscale       | 0.40 [0.00, 1.20]       |         | 0.50 [0.20, 1.30]                                                       | 0.30 [0.00, 0.80]       |          | <i>0.041</i>          |
| <b><i>Burnout Subscales</i></b>        |                             |                         |         |                                                                         |                         |          |                       |
|                                        | Professional Fulfillment    | 54.17 [37.50, 75.00]    |         | 50.00 [33.33, 75.00]                                                    | 58.33 [45.83, 75.00]    |          | <i>&lt;0.001</i>      |
|                                        | Work Exhaustion             | 43.75 [25.00, 68.75]    |         | 50.00 [25.00, 75.00]                                                    | 31.25 [18.75, 50.00]    |          | <i>&lt;0.001</i>      |
|                                        | Interpersonal Disengagement | 20.42 [0.00, 37.50]     |         | 25.00 [0.00, 41.67]                                                     | 8.33 [0.00, 25.00]      |          | <i>&lt;0.001</i>      |

Table 3: Severity categories and scores of Depression, Anxiety, Insomnia, Distress, Burnout, and Professional Fulfillment Measurements in Total Cohort and Categorized Between Direct COVID Care.

| <i>Gender</i>      |               |              |        |
|--------------------|---------------|--------------|--------|
| Male               | 1 [Reference] |              | N/A    |
| Female             | 1.95          | (1.12, 3.42) | 0.019  |
| <i>Health Care</i> |               |              |        |
| Nurse              | 1 [Reference] |              | N/A    |
| Doctor             | 2.24          | (1.27, 3.94) | 0.005  |
| <i>COVID Care</i>  |               |              |        |
| Second-line        | 1 [Reference] |              | N/A    |
| Frontline          | 3.55          | (1.77, 7.11) | <0.001 |

**GAD-7: Anxiety**

| <i>Gender</i>      |               |              |       |
|--------------------|---------------|--------------|-------|
| Male               | 1 [Reference] |              | N/A   |
| Female             | 1.95          | (1.04, 3.65) | 0.036 |
| <i>Health Care</i> |               |              |       |
| Nurse              | 1 [Reference] |              | N/A   |
| Doctor             | 2.29          | (1.21, 4.32) | 0.011 |
| <i>COVID Care</i>  |               |              |       |
| Second-line        | 1 [Reference] |              | N/A   |
| Frontline          | 2.51          | (1.20, 5.25) | 0.014 |

**ISI: Insomnia**

| <i>Gender</i>      |               |              |       |
|--------------------|---------------|--------------|-------|
| Male               | 1 [Reference] |              | N/A   |
| Female             | 1.77          | (0.85, 3.70) | 0.127 |
| <i>Health Care</i> |               |              |       |
| Nurse              | 1 [Reference] |              | N/A   |
| Doctor             | 3.08          | (1.38, 6.89) | 0.006 |
| <i>COVID Care</i>  |               |              |       |
| Second-line        | 1 [Reference] |              | N/A   |
| Frontline          | 4.45          | (1.51, 13.1) | 0.007 |

| <i>Gender</i>      |               |              |       |
|--------------------|---------------|--------------|-------|
| Male               | 1 [Reference] |              | N/A   |
| Female             | 2.18          | (1.32, 3.60) | 0.002 |
| <i>Health Care</i> |               |              |       |
| Nurse              | 1 [Reference] |              | N/A   |
| Doctor             | 1.09          | (0.67, 1.76) | 0.738 |
| <i>COVID Care</i>  |               |              |       |
| Second-line        | 1 [Reference] |              | N/A   |
| Frontline          | 1.89          | (1.10, 3.17) | 0.021 |

**SPFI: Burnout**

| <i>Gender</i>      |               |              |        |
|--------------------|---------------|--------------|--------|
| Male               | 1 [Reference] |              | N/A    |
| Female             | 1.73          | (1.11, 2.71) | 0.017  |
| <i>Health Care</i> |               |              |        |
| Nurse              | 1 [Reference] |              | N/A    |
| Doctor             | 0.86          | (0.55, 1.34) | 0.858  |
| <i>COVID Care</i>  |               |              |        |
| Second-line        | 1 [Reference] |              | N/A    |
| Frontline          | 2.74          | (1.69, 4.42) | <0.001 |

**SPFI: Professional Fulfillment**

| <i>Gender</i>      |               |              |       |
|--------------------|---------------|--------------|-------|
| Male               | 1 [Reference] |              | N/A   |
| Female             | 0.72          | (0.42, 1.24) | 0.234 |
| <i>Health Care</i> |               |              |       |
| Nurse              | 1 [Reference] |              | N/A   |
| Doctor             | 0.90          | (0.52, 1.57) | 0.900 |
| <i>COVID Care</i>  |               |              |       |
| Second-line        | 1 [Reference] |              | N/A   |
| Frontline          | 0.78          | (0.45, 1.37) | 0.788 |

Table 4: Multivariate logistic regression analysis. Adj OR: adjusted odds ratio, CI: confidence interval.

<sup>a</sup>Adjusted for age, gender, marital status, working title and COVID care where appropriate.

**Hospital**

|                                        |              | <b>Private ( n =365)</b> | <b>Public ( n = 68)</b> | <b>P Value</b> |
|----------------------------------------|--------------|--------------------------|-------------------------|----------------|
| <b><u>Depression</u></b>               |              | <b>(n = 357)</b>         | <b>(n = 68)</b>         |                |
| <b><i>PHQ-9</i></b>                    | None         | 176 (49.3%)              | 21 (30.9%)              | <i>0.014</i>   |
|                                        | Mild         | 114 (31.9%)              | 25 (36.8%)              |                |
|                                        | Moderate     | 39 (10.9%)               | 11 (16.2%)              |                |
|                                        | Severe       | 28 (7.8%)                | 11 (16.2%)              |                |
| <b><u>Anxiety</u></b>                  |              | <b>(n = 351)</b>         | <b>(n = 67)</b>         |                |
| <b><i>GAD-7</i></b>                    | Minimal      | 183 (52.1%)              | 25 (37.3%)              | <i>0.008</i>   |
|                                        | Mild         | 125 (35.6%)              | 23 (34.3%)              |                |
|                                        | Moderate     | 23 (6.6%)                | 10 (14.9%)              |                |
|                                        | Severe       | 20 (5.7%)                | 9 (13.4%)               |                |
| <b><u>Insomnia</u></b>                 |              | <b>(n = 351)</b>         | <b>(n = 67)</b>         |                |
| <b><i>ISI</i></b>                      | None         | 216 (61.5%)              | 30 (44.8%)              | <i>0.004</i>   |
|                                        | Subthreshold | 105 (29.9%)              | 22 (32.8%)              |                |
|                                        | Moderate     | 25 (7.1%)                | 14 (20.9%)              |                |
|                                        | Severe       | 5 (1.4%)                 | 1 (1.5%)                |                |
| <b><u>Distress</u></b>                 |              | <b>(n = 347)</b>         | <b>(n = 63)</b>         |                |
| <b><i>IESR</i></b>                     | Normal       | 246 (70.9%)              | 37 (58.7%)              | <i>0.014</i>   |
|                                        | Mild         | 39 (11.2%)               | 5 (7.9%)                |                |
|                                        | Moderate     | 15 (4.3%)                | 9 (14.3%)               |                |
|                                        | Severe       | 47 (13.5%)               | 12 (19.0%)              |                |
| <b><i>SPFI</i></b>                     |              | <b>(n = 343)</b>         | <b>(n = 61)</b>         |                |
| <b><u>Burnout</u></b>                  |              |                          |                         |                |
|                                        | ≤ 1.33       | 190 (55.4%)              | 29 (47.5%)              | <i>0.268</i>   |
|                                        | > 1.33       | 153 (44.6%)              | 32 (52.5%)              |                |
| <b><u>Professional Fulfillment</u></b> |              |                          |                         |                |
|                                        | ≤ 3.00       | 275 (80.4%)              | 52 (85.2%)              | <i>0.478</i>   |
|                                        | > 3.00       | 67 (19.6%)               | 9 (14.8%)               |                |

Table 5: Severity categories of Depression, Anxiety, Insomnia, Distress, Burnout, and Professional Fulfillment Measurements in Total Cohort and Categorized Between Private and Public Hospital.

STROBE Statement—Checklist of items that should be included in reports of *cross-sectional studies*

|                              | Item No | Recommendation                                                                                                                                                                                    | Page No |
|------------------------------|---------|---------------------------------------------------------------------------------------------------------------------------------------------------------------------------------------------------|---------|
| <b>Title and abstract</b>    | 1       | (a) Indicate the study's design with a commonly used term in the title or the abstract                                                                                                            | 3       |
|                              |         | (b) Provide in the abstract an informative and balanced summary of what was done and what was found                                                                                               | 3-4     |
| <b>Introduction</b>          |         |                                                                                                                                                                                                   |         |
| Background/rationale         | 2       | Explain the scientific background and rationale for the investigation being reported                                                                                                              | 5-6     |
| Objectives                   | 3       | State specific objectives, including any prespecified hypotheses                                                                                                                                  | 6-7     |
| <b>Methods</b>               |         |                                                                                                                                                                                                   |         |
| Study design                 | 4       | Present key elements of study design early in the paper                                                                                                                                           | 7       |
| Setting                      | 5       | Describe the setting, locations, and relevant dates, including periods of recruitment, exposure, follow-up, and data collection                                                                   | 7       |
| Participants                 | 6       | (a) Give the eligibility criteria, and the sources and methods of selection of participants                                                                                                       | 7-8     |
| Variables                    | 7       | Clearly define all outcomes, exposures, predictors, potential confounders, and effect modifiers. Give diagnostic criteria, if applicable                                                          | 8-9     |
| Data sources/<br>measurement | 8*      | For each variable of interest, give sources of data and details of methods of assessment (measurement). Describe comparability of assessment methods if there is more than one group              | 8-9     |
| Bias                         | 9       | Describe any efforts to address potential sources of bias                                                                                                                                         | 14      |
| Study size                   | 10      | Explain how the study size was arrived at                                                                                                                                                         | 7       |
| Quantitative variables       | 11      | Explain how quantitative variables were handled in the analyses. If applicable, describe which groupings were chosen and why                                                                      | 9       |
| Statistical methods          | 12      | (a) Describe all statistical methods, including those used to control for confounding                                                                                                             | 9       |
|                              |         | (b) Describe any methods used to examine subgroups and interactions                                                                                                                               | 9       |
|                              |         | (c) Explain how missing data were addressed                                                                                                                                                       | 9       |
|                              |         | (d) If applicable, describe analytical methods taking account of sampling strategy                                                                                                                | 9       |
|                              |         | (e) Describe any sensitivity analyses                                                                                                                                                             | -       |
| <b>Results</b>               |         |                                                                                                                                                                                                   |         |
| Participants                 | 13*     | (a) Report numbers of individuals at each stage of study—eg numbers potentially eligible, examined for eligibility, confirmed eligible, included in the study, completing follow-up, and analysed | 9       |
|                              |         | (b) Give reasons for non-participation at each stage                                                                                                                                              | -       |
|                              |         | (c) Consider use of a flow diagram                                                                                                                                                                | -       |
| Descriptive data             | 14*     | (a) Give characteristics of study participants (eg demographic, clinical, social) and information on exposures and potential confounders                                                          | 10      |
|                              |         | (b) Indicate number of participants with missing data for each variable of interest                                                                                                               | 10      |
| Outcome data                 | 15*     | Report numbers of outcome events or summary measures                                                                                                                                              | 10      |



|    |                          |    |                                                                                                                                                                                                              |
|----|--------------------------|----|--------------------------------------------------------------------------------------------------------------------------------------------------------------------------------------------------------------|
| 1  |                          |    |                                                                                                                                                                                                              |
| 2  | Main results             | 16 | (a) Give unadjusted estimates and, if applicable, confounder-adjusted estimates and their precision (eg, 95% confidence interval). Make clear which confounders were adjusted for and why they were included |
| 3  |                          |    | 9-11/<br>Tables                                                                                                                                                                                              |
| 4  |                          |    |                                                                                                                                                                                                              |
| 5  |                          |    |                                                                                                                                                                                                              |
| 6  |                          |    | (b) Report category boundaries when continuous variables were categorized                                                                                                                                    |
| 7  |                          |    | 9-11/<br>Tables                                                                                                                                                                                              |
| 8  |                          |    |                                                                                                                                                                                                              |
| 9  |                          |    | (c) If relevant, consider translating estimates of relative risk into absolute risk for a meaningful time period                                                                                             |
| 10 |                          |    | -                                                                                                                                                                                                            |
| 11 | Other analyses           | 17 | Report other analyses done—eg analyses of subgroups and interactions, and sensitivity analyses                                                                                                               |
| 12 |                          |    | -                                                                                                                                                                                                            |
| 13 |                          |    |                                                                                                                                                                                                              |
| 14 | <b>Discussion</b>        |    |                                                                                                                                                                                                              |
| 15 | Key results              | 18 | Summarise key results with reference to study objectives                                                                                                                                                     |
| 16 |                          |    | 11 – 14                                                                                                                                                                                                      |
| 17 | Limitations              | 19 | Discuss limitations of the study, taking into account sources of potential bias or imprecision. Discuss both direction and magnitude of any potential bias                                                   |
| 18 |                          |    | 14 – 15                                                                                                                                                                                                      |
| 19 |                          |    |                                                                                                                                                                                                              |
| 20 | Interpretation           | 20 | Give a cautious overall interpretation of results considering objectives, limitations, multiplicity of analyses, results from similar studies, and other relevant evidence                                   |
| 21 |                          |    | 11-15                                                                                                                                                                                                        |
| 22 |                          |    |                                                                                                                                                                                                              |
| 23 |                          |    |                                                                                                                                                                                                              |
| 24 | Generalisability         | 21 | Discuss the generalisability (external validity) of the study results                                                                                                                                        |
| 25 |                          |    | 11-15                                                                                                                                                                                                        |
| 26 | <b>Other information</b> |    |                                                                                                                                                                                                              |
| 27 | Funding                  | 22 | Give the source of funding and the role of the funders for the present study and, if applicable, for the original study on which the present article is based                                                |
| 28 |                          |    | N/A                                                                                                                                                                                                          |
| 29 |                          |    |                                                                                                                                                                                                              |
| 30 |                          |    |                                                                                                                                                                                                              |

31 \*Give information separately for exposed and unexposed groups.

32  
33  
34 **Note:** An Explanation and Elaboration article discusses each checklist item and gives methodological background and published examples of transparent reporting. The STROBE checklist is best used in conjunction with this article (freely available on the Web sites of PLoS Medicine at <http://www.plosmedicine.org/>, Annals of Internal Medicine at <http://www.annals.org/>, and Epidemiology at <http://www.epidem.com/>). Information on the STROBE Initiative is available at [www.strobe-statement.org](http://www.strobe-statement.org).

35  
36  
37  
38  
39  
40  
41  
42  
43  
44  
45  
46  
47  
48  
49  
50  
51  
52  
53  
54  
55  
56  
57  
58  
59  
60
